# Supplementary material
Source: Royal Society of Chemistry journal article supplement (doi:10.1039/d5em00984g)
Supplement: d5em00984g2.pdf [file d5em00984g2.pdf]

## Supplementary information

### Atmospheric Oxidation of Fenthion initiated by Hydroxyl Radical and Ozone

**Table S1.** Relative energy, enthalpy and free energy corresponding to the reactive species involved in the H-abstraction reactions of fenthion initiated by •OH calculated at M06-2X/6-311++G(d,p) and ωb97X-D/6-311++G(d,p) level of theory.

**Table S2.** Relative energy, enthalpy and free energy corresponding to the reactive species involved in the •OH-addition reactions of fenthion calculated at M06-2X/6-311++G(d,p) and ωb97X-D/6-311++G(d,p) level of theory.

**Table S3.** Calculated rate constants ( $k$ ,  $\text{cm}^3 \text{ molecule}^{-1} \text{ s}^{-1}$ ) and the total rate constant ( $k_{\text{total}}$ ,  $\text{cm}^3 \text{ molecule}^{-1} \text{ s}^{-1}$ ) for the studied •OH initiated reactions of fenthion over the temperature range 200 – 400 K.

**Table S4.** Relative energy, enthalpy and free energy corresponding to the reactive species involved in the studied subsequent reactions of the intermediates, IM19 and IM20 calculated at M06-2X/6-311++G(d,p) level of theory.

**Table S5:** The maximum absorbance wavelength, excitation energy, electronic transition and oscillator strength of fenthion and its products calculated at TD-M06-2X/6-311++G(d,p) level of theory.

**Table S6.** Relative energy, enthalpy and free energy corresponding to the reactive species involved in the O<sub>3</sub> initiated reactions of fenthion calculated at M06-2X/6-311++G(d,p) level of theory.

**Table S7.** Calculated rate constants ( $k$ ,  $\text{cm}^3 \text{ molecule}^{-1} \text{ s}^{-1}$ ) and the total rate constant ( $k_{\text{total}}$ ,  $\text{cm}^3 \text{ molecule}^{-1} \text{ s}^{-1}$ ) for the studied •O<sub>3</sub> initiated reactions of fenthion over the temperature range 200 – 400 K.

**Figure S1.** The IRC plots for the •OH initiated reactions of fenthion calculated at M06-2X/6-311++G(d,p) level of theory.

**Figure S2.** The geometry of reactive species involved in the H abstraction reaction of fenthion initiated by •OH optimized at M06-2X/6-311++G(d,p) level of theory.

**Figure S3.** The geometry of reactive species involved in the •OH-addition reactions of fenthion optimized at M06-2X/6-311++G(d,p) level of theory.

**Figure S4.** Time-dependent species population profiles for the reaction pathway R1 at 298 K, calculated at different pressures (P) using MESMER software employing RRKM theory.

**Figure S5.** The geometry of reactive species involved in the O<sub>3</sub> initiated reactions of fenthion optimized at M06-2X/6-311++G(d,p) level of theory.

**Table S1.** Relative energy ( $\Delta E$ ), enthalpy ( $\Delta H_{298}$ ) and free energy ( $\Delta G_{298}$ ) corresponding to the reactive species involved in the H-abstraction reactions of fenthion initiated by  $\bullet\text{OH}$  calculated at M06-2X/6-311++G(d,p) and  $\omega\text{b97X-D/6-311++G(d,p)}$  level of theory. The energy is given in kcal/mol. (For reaction labels refer Scheme 1)

| Reaction pathway | Reactive species      | H-abstraction        |                  |                  |                                     |                  |                  |
|------------------|-----------------------|----------------------|------------------|------------------|-------------------------------------|------------------|------------------|
|                  |                       | M06-2X/6-311++G(d,p) |                  |                  | $\omega\text{b97X-D/6-311++G(d,p)}$ |                  |                  |
|                  |                       | $\Delta E$           | $\Delta H_{298}$ | $\Delta G_{298}$ | $\Delta E$                          | $\Delta H_{298}$ | $\Delta G_{298}$ |
| R1               | RC1                   | -8.6                 | -9.1             | -0.7             | -9.5                                | -10.1            | -1.4             |
|                  | TS1                   | 2.1                  | 1.5              | 10.6             | 0.6                                 | 0.1              | 8.7              |
|                  | IC1                   | -12.5                | -12.3            | -5.3             | -10.0                               | -9.8             | -3.4             |
|                  | IM1+H <sub>2</sub> O  | -7.8                 | -7.6             | -9.0             | -9.5                                | -10.1            | -10.0            |
| R2               | RC2                   | -5.1                 | -5.9             | 4.0              | -4.8                                | -5.2             | 2.9              |
|                  | TS2                   | 2.4                  | 1.6              | 11.4             | 0.7                                 | -0.1             | 9.7              |
|                  | IC2                   | -10.1                | -10.5            | -1.5             | -8.3                                | -8.1             | -1.2             |
|                  | IM2+ H <sub>2</sub> O | -4.3                 | -4.0             | -5.3             | -1.5                                | -1.1             | -3.3             |
| R3               | RC3                   | -7.6                 | -7.9             | 0.7              | -6.9                                | -7.3             | 1.0              |
|                  | TS3                   | 0.6                  | -0.3             | 10.1             | -0.9                                | -1.6             | 8.3              |
|                  | IC3                   | -11.7                | -11.6            | -3.6             | -8.4                                | -8.4             | -0.8             |
|                  | IM3+ H <sub>2</sub> O | -4.9                 | -4.6             | -6.0             | -3.7                                | -3.3             | -5.2             |
| R4               | RC4                   | -6.5                 | -6.7             | 1.0              | -5.0                                | -5.2             | 2.8              |
|                  | TS4                   | -1.6                 | -2.5             | 6.8              | -2.5                                | -3.3             | 5.4              |
|                  | IC4                   | -25.7                | -25.5            | -19.1            | -25.8                               | -25.6            | -19.4            |
|                  | IM4+ H <sub>2</sub> O | -22.2                | -22.0            | -23.2            | -22.3                               | -22.0            | -23.5            |
| R5               | RC5                   | -4.9                 | -5.3             | 3.0              | -4.2                                | -4.5             | 3.0              |
|                  | TS5                   | -0.6                 | -1.6             | 8.1              | -2.7                                | -3.6             | 5.7              |
|                  | IC5                   | -30.2                | -30.1            | -23.5            | -30.6                               | -30.6            | -23.4            |
|                  | IM5+ H <sub>2</sub> O | -26.4                | -26.4            | -27.1            | -26.8                               | -26.7            | -27.6            |
| R6               | RC6                   | -5.1                 | -5.9             | 3.9              | -4.8                                | -5.2             | 2.9              |
|                  | TS6                   | 2.9                  | 2.2              | 9.9              | 2.8                                 | 3.9              | 7.6              |
|                  | IC6                   | -21.5                | -21.4            | -14.0            | -21.6                               | -21.5            | -13.9            |
|                  | IM6+ H <sub>2</sub> O | -17.0                | -16.7            | -18.1            | -17.2                               | -16.9            | -18.3            |

**Table S2.** Relative energy ( $\Delta E$ ), enthalpy ( $\Delta H_{298}$ ) and free energy ( $\Delta G_{298}$ ) corresponding to the reactive species involved in the  $\bullet\text{OH}$ -addition reactions of fenthion calculated at M06-2X/6-311++G(d,p) and  $\omega\text{b97X-D/6-311++G(d,p)}$  level of theory. (For reaction labels refer Scheme 2)

| Reaction pathway | Reactive species | $\bullet\text{OH}$ -addition |                  |                  |                                     |                  |                  |
|------------------|------------------|------------------------------|------------------|------------------|-------------------------------------|------------------|------------------|
|                  |                  | M06-2X/6-311++G(d,p)         |                  |                  | $\omega\text{b97X-D/6-311++G(d,p)}$ |                  |                  |
|                  |                  | $\Delta E$                   | $\Delta H_{298}$ | $\Delta G_{298}$ | $\Delta E$                          | $\Delta H_{298}$ | $\Delta G_{298}$ |
| R7               | RC7              | -8.8                         | -9.2             | -0.1             | -6.9                                | -7.3             | 1.1              |
|                  | TS7              | -1.1                         | -2.2             | 8.7              | -2.5                                | -3.4             | 6.8              |
|                  | IM7              | -21                          | -23              | -11              | -21.3                               | -22.5            | -12.1            |
| R8               | RC8              | -8.8                         | -9.2             | -0.1             | -6.9                                | -7.3             | 1.1              |
|                  | TS8              | 0.56                         | -0.5             | 9.8              | -0.6                                | -1.7             | 8.7              |
|                  | IM8              | -20                          | -21              | -10              | -19.4                               | -20.4            | -10.5            |
| R9               | RC9              | -8.8                         | -9.2             | -0.1             | -6.8                                | -7.0             | 0.1              |
|                  | TS9              | -0.4                         | -1.5             | 9.1              | -2.4                                | -3.4             | 6.8              |
|                  | IM9              | -18                          | -19              | -9.1             | -18.4                               | -19.5            | -9.3             |
| R10              | RC10             | -8.3                         | -8.6             | 0                | -6.6                                | -6.9             | 1.7              |
|                  | TS10             | -2.3                         | -3.3             | 7.4              | -3.6                                | -4.6             | 6.1              |
|                  | IM10             | -20                          | -22              | -10              | -20.4                               | -21.6            | -10.3            |
| R11              | RC11             | -8.3                         | -8.6             | 0                | -6.9                                | -7.3             | 1.0              |
|                  | TS11             | 0.42                         | -0.7             | 11               | -0.7                                | -0.7             | 8.2              |
|                  | IM11             | -24                          | -26              | -14              | -21.8                               | -22.9            | -12.0            |
| R12              | RC12             | -8.8                         | -9.2             | -0.1             | -7.6                                | -7.0             | 1.8              |
|                  | TS12             | -2.9                         | -4               | 7.1              | -4.7                                | -5.7             | 5.2              |
|                  | IM12             | -22                          | -23              | -11              | -21.8                               | -22.9            | -12.0            |
| R13              | RC13             | -4.7                         | -4.7             | 1.9              | -3.8                                | -3.9             | 3.5              |
|                  | TS13             | 1.48                         | 0.57             | 10               | -0.4                                | -1.3             | 8.4              |
|                  | IM13             | -22                          | -24              | -13              | -21.7                               | -22.9            | -12.4            |
| R14              | RC14             | -4.9                         | -4.7             | 1.3              | -3.4                                | -3.2             | 2.8              |
|                  | TS14             | 0.32                         | -0.6             | 9.5              | -1.1                                | -1.9             | 7.8              |
|                  | IM14             | -24                          | -25              | -15              | -23.5                               | -24.5            | -14.3            |
| R15              | RC15             | -4.9                         | -5.3             | 3                | -3.1                                | -3.0             | 3.2              |
|                  | TS15             | 2.17                         | 1.33             | 11               | -0.1                                | -0.8             | 8.4              |
|                  | IM15             | -17                          | -18              | -7.6             | -17.6                               | -18.7            | -8.7             |
| R16              | RC16             | -5                           | -5.3             | 1.9              | -3.7                                | -4.0             | 3.6              |
|                  | TS16             | 1.54                         | 0.62             | 11               | -0.4                                | -1.3             | 8.9              |
|                  | IM16             | -19                          | -20              | -9.2             | -19.2                               | -20.3            | -9.4             |
| R17              | RC17             | -4.7                         | -4.7             | 1.9              | -3.8                                | -3.9             | 3.5              |
|                  | TS17             | 3.39                         | 2.59             | 12               | 1.6                                 | 0.8              | 10.2             |
|                  | IM17             | -22                          | -24              | -12              | -22.3                               | -23.3            | -12.5            |
| R18              | RC18             | -4.7                         | -4.7             | 1.9              | -3.8                                | -3.9             | 3.5              |
|                  | TS18             | -0.2                         | -1               | 8.4              | -2.6                                | -3.3             | 5.9              |
|                  | IM18             | -19                          | -20              | -10              | -19.7                               | -20.7            | -10.7            |
| R19              | RC19             | -7.2                         | -7.4             | 0.7              | -6.9                                | -7.4             | 1.8              |
|                  | TS19             | -5.7                         | -6.6             | 3.4              | -5.3                                | -6.5             | 4.0              |
|                  | IM19             | -21                          | -23              | -11              | -18.6                               | -19.9            | -8.4             |
| R20              | RC20             | -7.3                         | -7.7             | 1.6              | -6.8                                | -7.3             | 1.9              |
|                  | TS20             | -5.6                         | -6.9             | 4                | -5.3                                | -6.6             | 4.2              |
|                  | IM20             | -16                          | -18              | -5.9             | -14.3                               | -15.5            | -4.7             |

**Table S3.** Calculated rate constants ( $k$ ,  $\text{cm}^3 \text{molecule}^{-1} \text{s}^{-1}$ ) and the total rate constant ( $k_{\text{total}}$ ,  $\text{cm}^3 \text{molecule}^{-1} \text{s}^{-1}$ ) for the studied  $\bullet\text{OH}$  initiated reactions of fenthion over the temperature range 200 – 400 K.

| Reaction Pathway                     | $k$ ( $\text{cm}^3\text{molecule}^{-1}\text{s}^{-1}$ ) |                                        |                                        |                                        |                                         |                                         |
|--------------------------------------|--------------------------------------------------------|----------------------------------------|----------------------------------------|----------------------------------------|-----------------------------------------|-----------------------------------------|
|                                      | 200 K                                                  | 250 K                                  | 298 K                                  | 300 K                                  | 350 K                                   | 400 K                                   |
| <b>R1</b>                            | $5.3 \times 10^{-14}$                                  | $5.7 \times 10^{-14}$                  | $6.4 \times 10^{-14}$                  | $6.5 \times 10^{-14}$                  | $7.5 \times 10^{-14}$                   | $8.7 \times 10^{-14}$                   |
| <b>R2</b>                            | $1.1 \times 10^{-15}$                                  | $1.2 \times 10^{-15}$                  | $1.3 \times 10^{-15}$                  | $1.3 \times 10^{-15}$                  | $1.5 \times 10^{-15}$                   | $1.8 \times 10^{-15}$                   |
| <b>R3</b>                            | $9.3 \times 10^{-15}$                                  | $9.7 \times 10^{-15}$                  | $1.0 \times 10^{-14}$                  | $1.0 \times 10^{-14}$                  | $1.2 \times 10^{-14}$                   | $1.4 \times 10^{-14}$                   |
| <b>R4</b>                            | $3.3 \times 10^{-12}$                                  | $2.1 \times 10^{-12}$                  | $1.6 \times 10^{-12}$                  | $1.6 \times 10^{-12}$                  | $1.3 \times 10^{-12}$                   | $1.2 \times 10^{-12}$                   |
| <b>R5</b>                            | $3.0 \times 10^{-17}$                                  | $3.9 \times 10^{-17}$                  | $4.9 \times 10^{-17}$                  | $5.0 \times 10^{-17}$                  | $6.2 \times 10^{-17}$                   | $7.7 \times 10^{-17}$                   |
| <b>R6</b>                            | $4.1 \times 10^{-13}$                                  | $5.1 \times 10^{-13}$                  | $6.2 \times 10^{-13}$                  | $6.2 \times 10^{-13}$                  | $7.5 \times 10^{-13}$                   | $9.0 \times 10^{-13}$                   |
| <b>R7</b>                            | $3.9 \times 10^{-16}$                                  | $1.7 \times 10^{-16}$                  | $1.1 \times 10^{-16}$                  | $1.1 \times 10^{-16}$                  | $8.3 \times 10^{-17}$                   | $7.0 \times 10^{-17}$                   |
| <b>R8</b>                            | $1.2 \times 10^{-14}$                                  | $1.2 \times 10^{-14}$                  | $1.2 \times 10^{-14}$                  | $1.2 \times 10^{-14}$                  | $1.3 \times 10^{-14}$                   | $1.4 \times 10^{-14}$                   |
| <b>R9</b>                            | $1.3 \times 10^{-13}$                                  | $1.1 \times 10^{-13}$                  | $1.0 \times 10^{-13}$                  | $9.9 \times 10^{-14}$                  | $9.6 \times 10^{-14}$                   | $9.7 \times 10^{-14}$                   |
| <b>R10</b>                           | $1.1 \times 10^{-11}$                                  | $3.5 \times 10^{-12}$                  | $1.7 \times 10^{-12}$                  | $1.7 \times 10^{-12}$                  | $1.0 \times 10^{-12}$                   | $7.8 \times 10^{-13}$                   |
| <b>R11</b>                           | $6.9 \times 10^{-15}$                                  | $6.4 \times 10^{-15}$                  | $6.5 \times 10^{-15}$                  | $6.5 \times 10^{-15}$                  | $6.9 \times 10^{-15}$                   | $7.5 \times 10^{-15}$                   |
| <b>R12</b>                           | $3.1 \times 10^{-11}$                                  | $7.1 \times 10^{-12}$                  | $2.8 \times 10^{-12}$                  | $2.7 \times 10^{-12}$                  | $1.4 \times 10^{-12}$                   | $9.2 \times 10^{-13}$                   |
| <b>R13</b>                           | $7.9 \times 10^{-17}$                                  | $6.8 \times 10^{-17}$                  | $6.7 \times 10^{-17}$                  | $6.7 \times 10^{-17}$                  | $7.1 \times 10^{-17}$                   | $7.8 \times 10^{-17}$                   |
| <b>R14</b>                           | $1.7 \times 10^{-14}$                                  | $1.8 \times 10^{-14}$                  | $2.0 \times 10^{-14}$                  | $2.0 \times 10^{-14}$                  | $2.3 \times 10^{-14}$                   | $2.6 \times 10^{-14}$                   |
| <b>R15</b>                           | $2.9 \times 10^{-14}$                                  | $3.1 \times 10^{-14}$                  | $3.3 \times 10^{-14}$                  | $3.3 \times 10^{-14}$                  | $3.7 \times 10^{-14}$                   | $4.1 \times 10^{-14}$                   |
| <b>R16</b>                           | $1.7 \times 10^{-14}$                                  | $1.7 \times 10^{-14}$                  | $1.8 \times 10^{-14}$                  | $1.8 \times 10^{-14}$                  | $2.0 \times 10^{-14}$                   | $2.2 \times 10^{-14}$                   |
| <b>R17</b>                           | $3.2 \times 10^{-15}$                                  | $2.4 \times 10^{-15}$                  | $2.2 \times 10^{-15}$                  | $2.2 \times 10^{-15}$                  | $2.0 \times 10^{-15}$                   | $2.1 \times 10^{-15}$                   |
| <b>R18</b>                           | $3.3 \times 10^{-13}$                                  | $3.3 \times 10^{-13}$                  | $3.4 \times 10^{-13}$                  | $3.4 \times 10^{-13}$                  | $3.6 \times 10^{-13}$                   | $4.0 \times 10^{-13}$                   |
| <b>R19</b>                           | $1.6 \times 10^{-7}$                                   | $9.8 \times 10^{-9}$                   | $1.6 \times 10^{-9}$                   | $1.5 \times 10^{-9}$                   | $4.3 \times 10^{-10}$                   | $1.6 \times 10^{-10}$                   |
| <b>R20</b>                           | $7.5 \times 10^{-8}$                                   | $3.9 \times 10^{-9}$                   | $6.0 \times 10^{-10}$                  | $5.6 \times 10^{-10}$                  | $1.4 \times 10^{-10}$                   | $5.5 \times 10^{-11}$                   |
| <b><math>k_{\text{total}}</math></b> | <b><math>2.4 \times 10^{-7}</math></b>                 | <b><math>1.3 \times 10^{-8}</math></b> | <b><math>2.2 \times 10^{-9}</math></b> | <b><math>2.1 \times 10^{-9}</math></b> | <b><math>5.9 \times 10^{-10}</math></b> | <b><math>2.2 \times 10^{-10}</math></b> |

**Table S4.** Relative energy ( $\Delta E$ ), enthalpy ( $\Delta H_{298}$ ) and free energy ( $\Delta G_{298}$ ) corresponding to the reactive species involved in the studied subsequent reactions of the intermediates, IM19

| Reaction pathway | Reactive species       | $\Delta E$ | $\Delta H_{298}$ | $\Delta G_{298}$ |
|------------------|------------------------|------------|------------------|------------------|
| R19a             | IM19                   | 0          | 0                | 0                |
|                  | P1                     | -64.4      | -65.6            | -54.0            |
| R21a             | IM19                   | 0          | 0                | 0                |
|                  | RC21a                  | -21.3      | -22.7            | -11.0            |
|                  | TS21a                  | -15.7      | -17.0            | -5.5             |
|                  | IC21a                  | -37.7      | -38.7            | -27.2            |
|                  | IM21+P3                | -28.8      | -30.1            | -30.9            |
| R19b             | IM19+O <sub>2</sub>    | 0          | 0                | 0                |
|                  | RC19b                  | -3.1       | -2.8             | 5.5              |
|                  | TS19b                  | 6.7        | 6.1              | 16.9             |
|                  | IM19b                  | 0.5        | -0.1             | 10.6             |
| R19b1            | IM19+O <sub>2</sub>    | 0          | 0                | 0                |
|                  | TS19b1                 | 0.6        | -0.3             | 10.6             |
|                  | IC19b1                 | -32.7      | -32.8            | -35.1            |
|                  | P5+SOOH                | -19.4      | -19.5            | -22.8            |
| R20a             | IM20                   | 0          | 0                | 0                |
|                  | P2                     | -67.4      | -68.7            | -56.9            |
| R21b             | IM20                   | 0          | 0                | 0                |
|                  | RC21b                  | -18.6      | -19.9            | -8.3             |
|                  | TS21b                  | -14.1      | -15.5            | -4.0             |
|                  | IC21b                  | -40.5      | -41.5            | -31.9            |
|                  | IM21+P3                | -27.9      | -29.2            | -29.9            |
| R20b             | IM20+ O <sub>2</sub>   | 0          | 0                | 0                |
|                  | RC20b                  | -1.7       | -1.3             | 5.8              |
|                  | TS20b                  | 6.2        | 5.5              | 16.3             |
|                  | IM20b                  | -0.2       | -0.9             | 10.2             |
| R20b1            | IM20+ O <sub>2</sub>   | 0          | 0                | 0                |
|                  | TS20b1                 | -9.9       | -11.0            | 1.4              |
|                  | IC20b1                 | -30.6      | -30.0            | -32.1            |
|                  | P6+SOOH                | -24.8      | -24.9            | -28.0            |
| R22              | IM21+HO <sub>2</sub> • | 0          | 0                | 0                |
|                  | RC22                   | -12.6      | -12.7            | -3.2             |
|                  | TS22                   | -11.2      | -11.7            | -1.0             |
|                  | IC22                   | -43.5      | -42.9            | -35.5            |
|                  | P4+ O <sub>2</sub>     | -40.4      | -40.3            | -39.2            |

and IM20 calculated at M06-2X/6-311++G(d,p) level of theory. (For reaction labels refer Scheme 3)

**Table S5:** The maximum absorbance wavelength ( $\lambda_{\max}$  in nm), excitation energy ( $T_v$  in eV), electronic transition and oscillator strength (f in a.u) of fenthion and its products calculated at TD-M06-2X/6-311++G(d,p) level of theory.

| Reactive species | $\lambda_{\max}$ | $T_v$ | Electronic transition | f    |
|------------------|------------------|-------|-----------------------|------|
| <b>Fenthion</b>  | 209              | 5.93  | H-1 $\rightarrow$ L+1 | 0.12 |
| <b>P1</b>        | 222              | 5.57  | H $\rightarrow$ L+4   | 0.34 |
| <b>P2</b>        | 220              | 5.63  | H-1 $\rightarrow$ L+2 | 0.17 |
| <b>P3</b>        | 216              | 5.72  | H $\rightarrow$ L+4   | 0.19 |
| <b>P4</b>        | 202              | 6.12  | H-1 $\rightarrow$ L   | 0.07 |
| <b>P5</b>        | 211              | 5.85  | H-2 $\rightarrow$ L+2 | 0.18 |
| <b>P6</b>        | 210              | 5.90  | H-1 $\rightarrow$ L+1 | 0.11 |

**Table S6.** Relative energy ( $\Delta E$ ), enthalpy ( $\Delta H_{298}$ ) and free energy ( $\Delta G_{298}$ ) corresponding to the reactive species involved in the  $O_3$  initiated reactions of fenthion calculated at M06-2X/6-311++G(d,p) level of theory. (For reaction labels refer Discussions in Page no. 13 of the main manuscript)

| Reaction pathway | Reactive species | $O_3$ -addition |                  |                  |
|------------------|------------------|-----------------|------------------|------------------|
|                  |                  | $\Delta E$      | $\Delta H_{298}$ | $\Delta G_{298}$ |
| <b>S1FE</b>      | <b>ORC1</b>      | -7.1            | -6.7             | 3.9              |
|                  | <b>OTS1</b>      | 5.5             | 4.8              | 18.8             |
|                  | <b>PO1</b>       | -39.2           | -40.3            | -25.6            |
| <b>S1FX</b>      | <b>ORC2</b>      | -6.4            | -6.1             | 5.0              |
|                  | <b>OTS2</b>      | 7.9             | 7.2              | 21.2             |
|                  | <b>PO2</b>       | -38.7           | -39.9            | -25.3            |
| <b>S1BE</b>      | <b>ORC3</b>      | -5.4            | -4.9             | 3.7              |
|                  | <b>OTS3</b>      | 6.4             | 5.6              | 19.6             |
|                  | <b>PO3</b>       | -37.9           | -39.0            | -24.4            |
| <b>S1BX</b>      | <b>ORC4</b>      | -4.4            | -3.9             | 5.4              |
|                  | <b>OTS4</b>      | 8.5             | 7.8              | 21.7             |
|                  | <b>PO4</b>       | -37.3           | -38.4            | -24.0            |
| <b>S2FE</b>      | <b>ORC5</b>      | -8.1            | -8.0             | 3.6              |
|                  | <b>OTS5</b>      | 4.6             | 3.8              | 18.7             |
|                  | <b>PO5</b>       | -35.7           | -36.9            | -21.6            |
| <b>S2FX</b>      | <b>ORC6</b>      | -9.1            | -9.2             | 3.6              |
|                  | <b>OTS6</b>      | 5.9             | 5.0              | 19.8             |

|             |              |       |       |       |
|-------------|--------------|-------|-------|-------|
|             | <b>PO6</b>   | -36.7 | -38.0 | -22.7 |
| <b>S2BE</b> | <b>ORC7</b>  | -5.3  | -4.8  | 4.2   |
|             | <b>OTS7</b>  | 7.1   | 6.5   | 19.5  |
|             | <b>PO7</b>   | -37.1 | -38.4 | -23.3 |
| <b>S2BX</b> | <b>ORC8</b>  | -4.8  | -4.4  | 4.9   |
|             | <b>OTS8</b>  | 9.9   | 9.2   | 22.8  |
|             | <b>PO8</b>   | -38.6 | -39.9 | -24.1 |
| <b>S3FE</b> | <b>ORC9</b>  | -8.1  | -8.0  | 3.6   |
|             | <b>OTS9</b>  | 3.7   | 2.8   | 17.7  |
|             | <b>PO9</b>   | -38.6 | -39.7 | -24.7 |
| <b>S3FX</b> | <b>ORC10</b> | -9.1  | -9.2  | 3.6   |
|             | <b>OTS10</b> | 5.3   | 4.2   | 20.3  |
|             | <b>PO10</b>  | -39.5 | -40.6 | -25.5 |
| <b>S3BE</b> | <b>ORC11</b> | -5.4  | -4.9  | 4.3   |
|             | <b>OTS11</b> | 7.4   | 6.8   | 20.3  |
|             | <b>PO11</b>  | -38.3 | -39.3 | -25.9 |
| <b>S3BX</b> | <b>ORC12</b> | -8.5  | -8.4  | 2.9   |
|             | <b>OTS12</b> | 9.1   | 8.5   | 21.4  |
|             | <b>PO12</b>  | -40.5 | -42.1 | -25.1 |
| <b>S4FE</b> | <b>ORC13</b> | -7.1  | -6.9  | 4.6   |
|             | <b>OTS13</b> | 5.4   | 4.6   | 19.4  |
|             | <b>PO13</b>  | -38.3 | -39.4 | -24.8 |
| <b>S4FX</b> | <b>ORC14</b> | -7.4  | -7.1  | 3.7   |
|             | <b>OTS14</b> | 8.5   | 7.9   | 21.8  |
|             | <b>PO14</b>  | -37.5 | -38.5 | -23.5 |
| <b>S4BE</b> | <b>ORC15</b> | -5.0  | -4.4  | 3.8   |
|             | <b>OTS15</b> | 8.1   | 7.5   | 20.3  |
|             | <b>PO15</b>  | -35.7 | -36.7 | -22.7 |
| <b>S4BX</b> | <b>ORC16</b> | -3.8  | -3.2  | 5.7   |
|             | <b>OTS16</b> | 10.6  | 10.0  | 23.2  |
|             | <b>PO16</b>  | -34.6 | -35.5 | -22.0 |
| <b>S5FE</b> | <b>ORC17</b> | -5.0  | -4.6  | 5.4   |
|             | <b>OTS17</b> | 9.0   | 8.4   | 21.8  |
|             | <b>PO17</b>  | -36.2 | -37.1 | -22.8 |
| <b>S5FX</b> | <b>ORC18</b> | -5.2  | -4.7  | 5.4   |
|             | <b>OTS18</b> | 10.5  | 9.9   | 23.9  |
|             | <b>PO18</b>  | -38.8 | -39.8 | -25.4 |
| <b>S5BE</b> | <b>ORC19</b> | -5.4  | -4.9  | 4.3   |
|             | <b>OTS19</b> | 9.2   | 8.6   | 22.0  |
|             | <b>PO19</b>  | -36.9 | -38.0 | -22.8 |
| <b>S5BX</b> | <b>ORC20</b> | -5.0  | -4.5  | 4.4   |
|             | <b>OTS20</b> | 10.7  | 10.1  | 22.4  |

|             |              |       |       |       |
|-------------|--------------|-------|-------|-------|
|             | <b>PO20</b>  | -40.5 | -41.6 | -26.5 |
| <b>S6FE</b> | <b>ORC21</b> | -7.2  | -6.9  | 4.6   |
|             | <b>OTS21</b> | 6.4   | 5.6   | 20.6  |
|             | <b>PO21</b>  | -39.4 | -40.6 | -24.7 |
| <b>S6FX</b> | <b>ORC22</b> | -7.7  | -7.4  | 4.1   |
|             | <b>OTS22</b> | 10.3  | 9.5   | 24.5  |
|             | <b>PO22</b>  | -40.4 | -41.6 | -25.8 |
| <b>S6BE</b> | <b>ORC23</b> | -5.5  | -5.0  | 3.6   |
|             | <b>OTS23</b> | 8.0   | 7.4   | 21.0  |
|             | <b>PO23</b>  | -40.3 | -41.3 | -26.9 |
| <b>S6BX</b> | <b>ORC24</b> | -5.4  | -4.9  | 4.5   |
|             | <b>OTS24</b> | 9.7   | 9.1   | 22.5  |
|             | <b>PO24</b>  | -43.4 | -44.5 | -29.5 |
| <b>S7PS</b> | <b>ORC25</b> | -5.4  | -5.1  | 5.1   |
|             | <b>OTS25</b> | 4.9   | 4.2   | 18.2  |
|             | <b>PO25</b>  | -28.5 | -29.6 | -14.4 |

**Table S7.** Calculated rate constants ( $k$ ,  $\text{cm}^3 \text{molecule}^{-1} \text{s}^{-1}$ ) and the total rate constant ( $k_{\text{total}}$ ,  $\text{cm}^3 \text{molecule}^{-1} \text{s}^{-1}$ ) for the studied  $\bullet\text{O}_3$  initiated reactions of fenthion over the temperature range

| Reaction Pathway                     | $k$ ( $\text{cm}^3\text{molecule}^{-1}\text{s}^{-1}$ ) |                        |                        |                        |                        |                        |
|--------------------------------------|--------------------------------------------------------|------------------------|------------------------|------------------------|------------------------|------------------------|
|                                      | 200 K                                                  | 250 K                  | 298 K                  | 300 K                  | 350 K                  | 400 K                  |
| <b>S1FE</b>                          | $1.34 \times 10^{-21}$                                 | $1.04 \times 10^{-20}$ | $4.07 \times 10^{-20}$ | $4.28 \times 10^{-20}$ | $4.51 \times 10^{-20}$ | $1.38 \times 10^{-19}$ |
| <b>S1FX</b>                          | $3.07 \times 10^{-24}$                                 | $7.99 \times 10^{-23}$ | $6.65 \times 10^{-22}$ | $7.20 \times 10^{-22}$ | $7.78 \times 10^{-22}$ | $4.27 \times 10^{-21}$ |
| <b>S1BE</b>                          | $1.91 \times 10^{-22}$                                 | $2.25 \times 10^{-21}$ | $1.14 \times 10^{-20}$ | $1.21 \times 10^{-20}$ | $1.28 \times 10^{-20}$ | $4.77 \times 10^{-20}$ |
| <b>S1BX</b>                          | $7.33 \times 10^{-25}$                                 | $2.59 \times 10^{-23}$ | $2.60 \times 10^{-22}$ | $2.84 \times 10^{-22}$ | $3.09 \times 10^{-22}$ | $1.95 \times 10^{-21}$ |
| <b>S2FE</b>                          | $5.11 \times 10^{-21}$                                 | $2.21 \times 10^{-20}$ | $6.04 \times 10^{-20}$ | $6.27 \times 10^{-20}$ | $6.52 \times 10^{-20}$ | $1.52 \times 10^{-19}$ |
| <b>S2FX</b>                          | $1.78 \times 10^{-22}$                                 | $1.06 \times 10^{-21}$ | $3.49 \times 10^{-21}$ | $3.65 \times 10^{-21}$ | $3.82 \times 10^{-21}$ | $1.03 \times 10^{-20}$ |
| <b>S2BE</b>                          | $1.12 \times 10^{-22}$                                 | $3.98 \times 10^{-22}$ | $2.56 \times 10^{-21}$ | $2.75 \times 10^{-21}$ | $2.94 \times 10^{-21}$ | $1.33 \times 10^{-20}$ |
| <b>S2BX</b>                          | $3.55 \times 10^{-26}$                                 | $2.52 \times 10^{-24}$ | $3.93 \times 10^{-23}$ | $4.35 \times 10^{-23}$ | $4.81 \times 10^{-23}$ | $4.27 \times 10^{-22}$ |
| <b>S3FE</b>                          | $5.53 \times 10^{-20}$                                 | $1.54 \times 10^{-19}$ | $3.17 \times 10^{-19}$ | $3.26 \times 10^{-19}$ | $3.36 \times 10^{-19}$ | $6.31 \times 10^{-19}$ |
| <b>S3FX</b>                          | $1.78 \times 10^{-22}$                                 | $1.06 \times 10^{-21}$ | $3.49 \times 10^{-21}$ | $3.65 \times 10^{-21}$ | $3.82 \times 10^{-21}$ | $1.03 \times 10^{-20}$ |
| <b>S3BE</b>                          | $2.31 \times 10^{-23}$                                 | $4.80 \times 10^{-22}$ | $3.46 \times 10^{-21}$ | $3.73 \times 10^{-21}$ | $4.01 \times 10^{-21}$ | $1.97 \times 10^{-20}$ |
| <b>S3BX</b>                          | $6.99 \times 10^{-25}$                                 | $3.62 \times 10^{-23}$ | $4.62 \times 10^{-22}$ | $1.42 \times 10^{-22}$ | $1.55 \times 10^{-22}$ | $1.16 \times 10^{-21}$ |
| <b>S4FE</b>                          | $6.18 \times 10^{-22}$                                 | $4.41 \times 10^{-21}$ | $1.63 \times 10^{-20}$ | $1.71 \times 10^{-20}$ | $1.80 \times 10^{-20}$ | $5.27 \times 10^{-20}$ |
| <b>S4FX</b>                          | $6.57 \times 10^{-25}$                                 | $2.39 \times 10^{-23}$ | $2.44 \times 10^{-22}$ | $2.66 \times 10^{-22}$ | $2.90 \times 10^{-22}$ | $1.86 \times 10^{-21}$ |
| <b>S4BE</b>                          | $1.08 \times 10^{-23}$                                 | $3.34 \times 10^{-22}$ | $9.53 \times 10^{-22}$ | $1.03 \times 10^{-21}$ | $1.12 \times 10^{-21}$ | $6.53 \times 10^{-21}$ |
| <b>S4BX</b>                          | $1.21 \times 10^{-26}$                                 | $1.27 \times 10^{-24}$ | $2.51 \times 10^{-23}$ | $2.81 \times 10^{-23}$ | $3.13 \times 10^{-23}$ | $3.34 \times 10^{-22}$ |
| <b>S5FE</b>                          | $1.80 \times 10^{-26}$                                 | $8.01 \times 10^{-25}$ | $9.51 \times 10^{-24}$ | $1.04 \times 10^{-23}$ | $1.14 \times 10^{-23}$ | $8.40 \times 10^{-23}$ |
| <b>S5FX</b>                          | $3.39 \times 10^{-27}$                                 | $3.40 \times 10^{-25}$ | $6.59 \times 10^{-24}$ | $7.36 \times 10^{-24}$ | $8.20 \times 10^{-24}$ | $8.65 \times 10^{-23}$ |
| <b>S5BE</b>                          | $2.53 \times 10^{-25}$                                 | $1.33 \times 10^{-23}$ | $1.71 \times 10^{-22}$ | $1.89 \times 10^{-22}$ | $2.07 \times 10^{-22}$ | $1.59 \times 10^{-21}$ |
| <b>S5BX</b>                          | $3.28 \times 10^{-27}$                                 | $3.55 \times 10^{-25}$ | $7.21 \times 10^{-24}$ | $8.06 \times 10^{-24}$ | $9.00 \times 10^{-24}$ | $9.81 \times 10^{-23}$ |
| <b>S6FE</b>                          | $4.05 \times 10^{-23}$                                 | $4.40 \times 10^{-22}$ | $2.12 \times 10^{-21}$ | $2.25 \times 10^{-21}$ | $2.39 \times 10^{-21}$ | $8.63 \times 10^{-21}$ |
| <b>S6FX</b>                          | $1.81 \times 10^{-27}$                                 | $1.49 \times 10^{-25}$ | $2.53 \times 10^{-24}$ | $2.81 \times 10^{-24}$ | $3.12 \times 10^{-24}$ | $2.98 \times 10^{-23}$ |
| <b>S6BE</b>                          | $3.91 \times 10^{-24}$                                 | $1.12 \times 10^{-22}$ | $9.86 \times 10^{-22}$ | $1.07 \times 10^{-21}$ | $1.16 \times 10^{-21}$ | $6.63 \times 10^{-21}$ |
| <b>S6BX</b>                          | $6.53 \times 10^{-26}$                                 | $4.36 \times 10^{-24}$ | $6.56 \times 10^{-23}$ | $7.26 \times 10^{-23}$ | $8.02 \times 10^{-23}$ | $6.93 \times 10^{-22}$ |
| <b>PS</b>                            | $3.55 \times 10^{-18}$                                 | $5.79 \times 10^{-18}$ | $8.46 \times 10^{-18}$ | $8.59 \times 10^{-18}$ | $8.72 \times 10^{-18}$ | $1.25 \times 10^{-17}$ |
| <b><math>k_{\text{total}}</math></b> | $3.61 \times 10^{-18}$                                 | $5.99 \times 10^{-18}$ | $8.92 \times 10^{-18}$ | $9.07 \times 10^{-18}$ | $9.22 \times 10^{-18}$ | $1.36 \times 10^{-18}$ |

200 – 400 K.

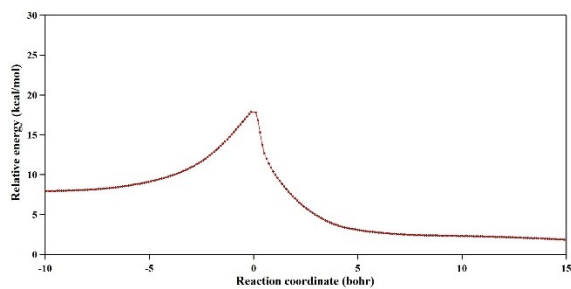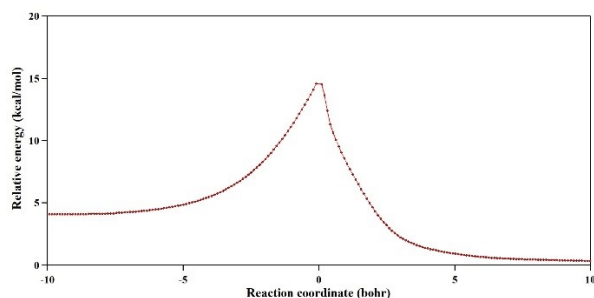

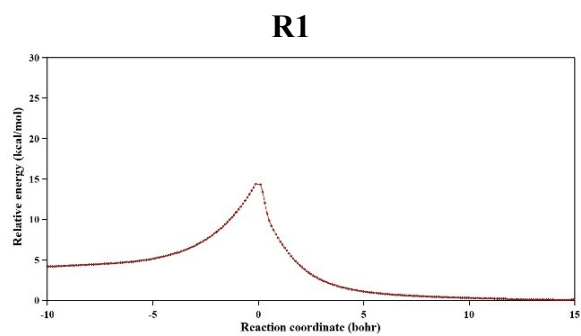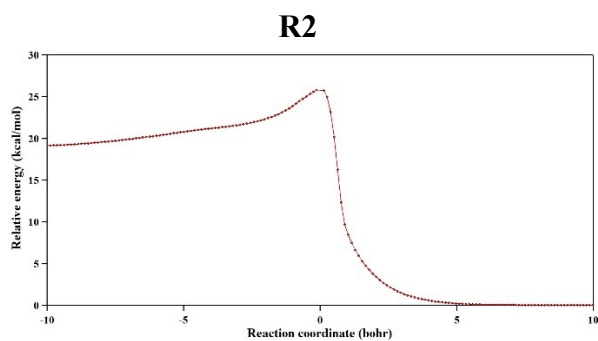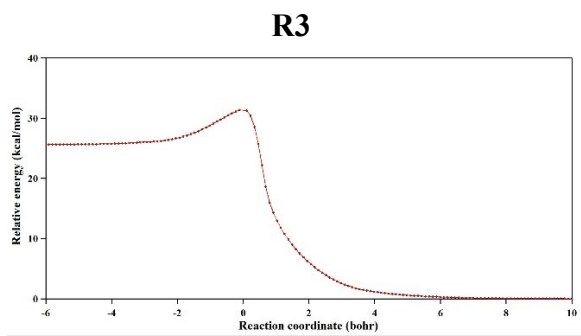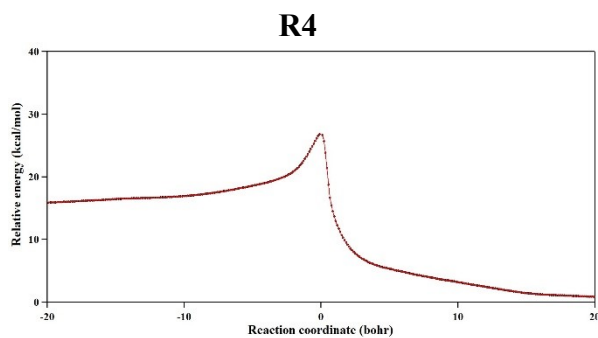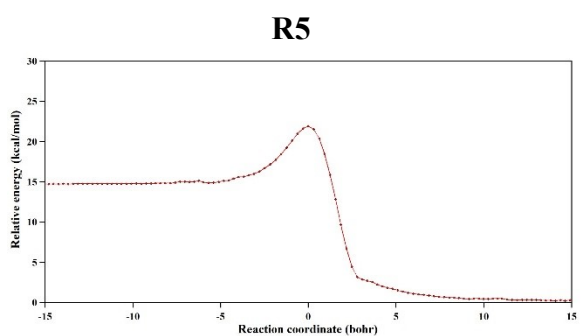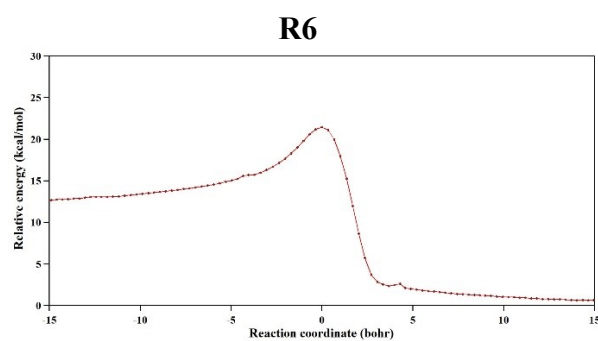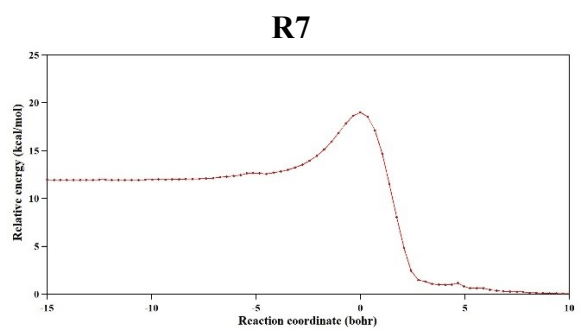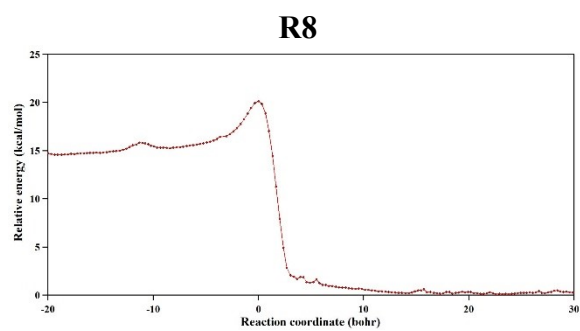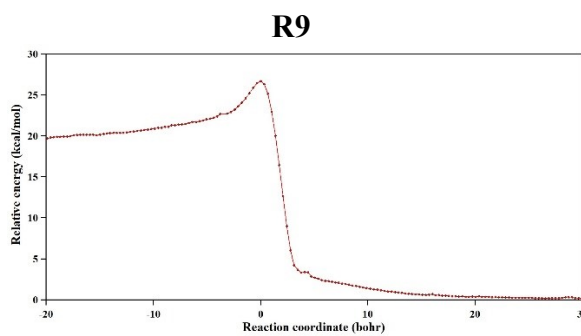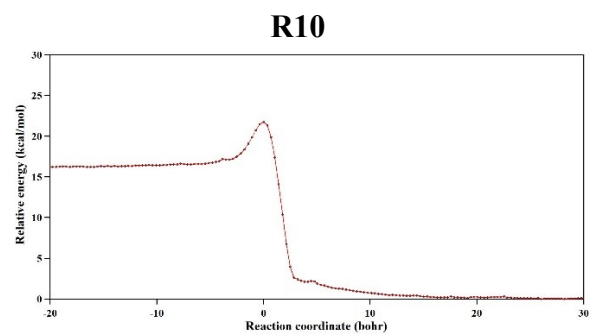

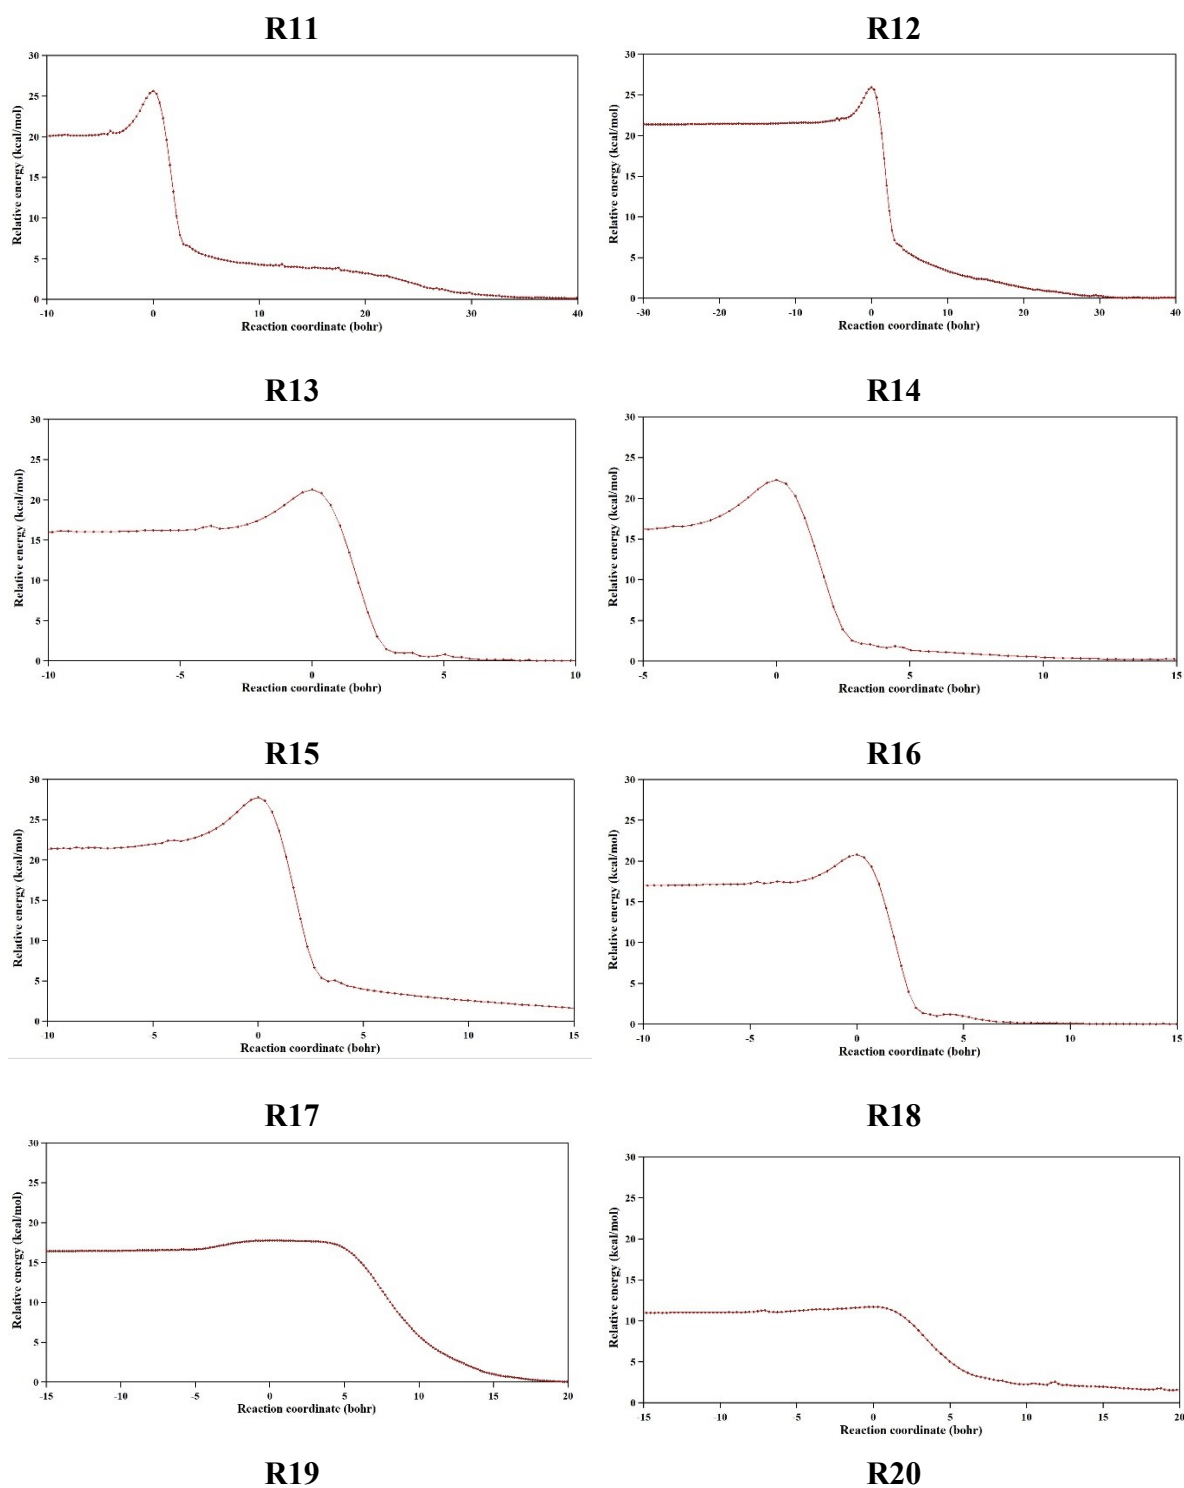

**Figure S1.** The IRC plots for the  $\bullet\text{OH}$  initiated reactions of fenthion calculated at M06-2X/6-311++G(d,p) level of theory.

**REACTANT COMPLEX  
(RC)**

**TRANSITION STATE  
(TS)**

**PRODUCT COMPLEX  
(PC)**

**R1**

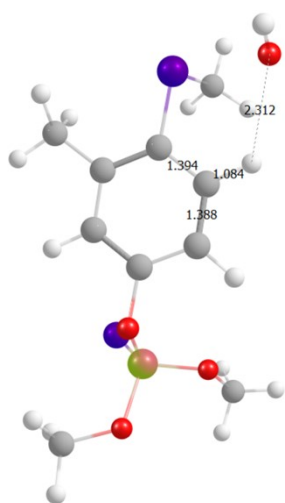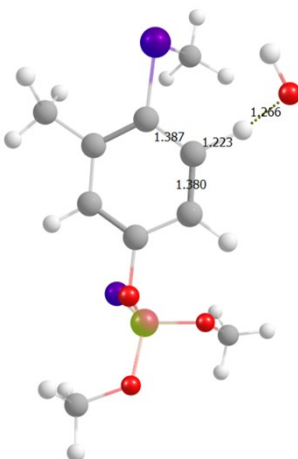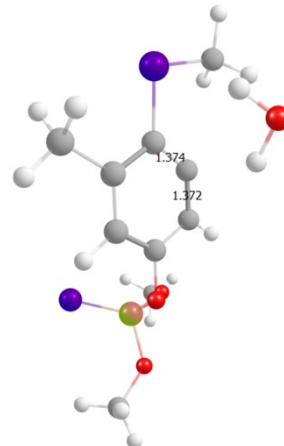

**R2**

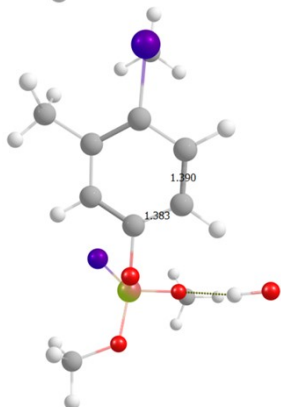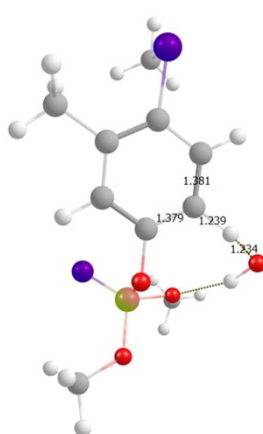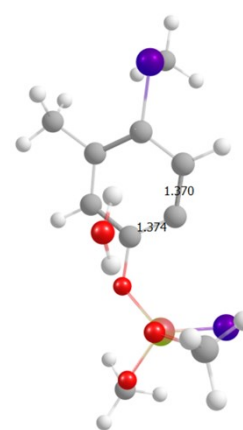

**R3**

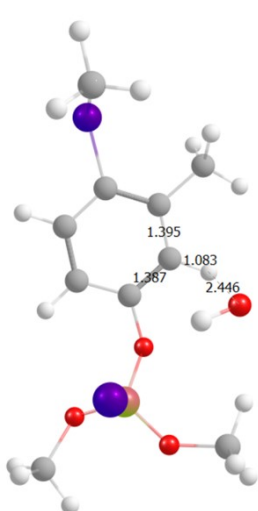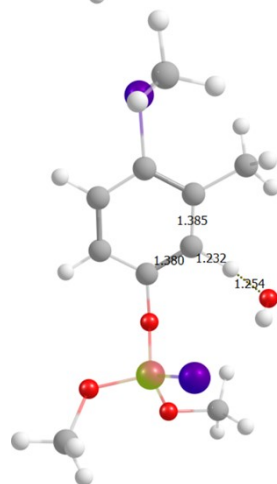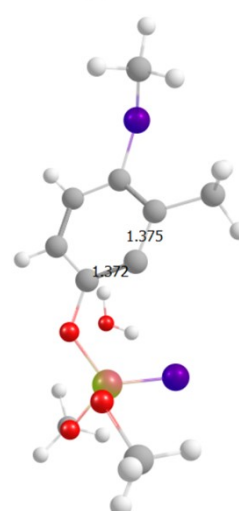

R4

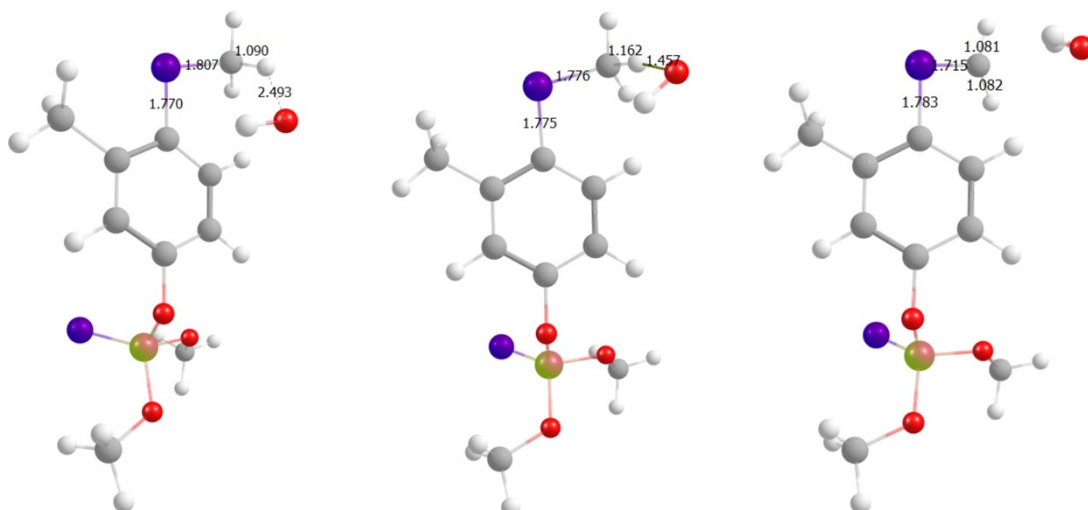

R5

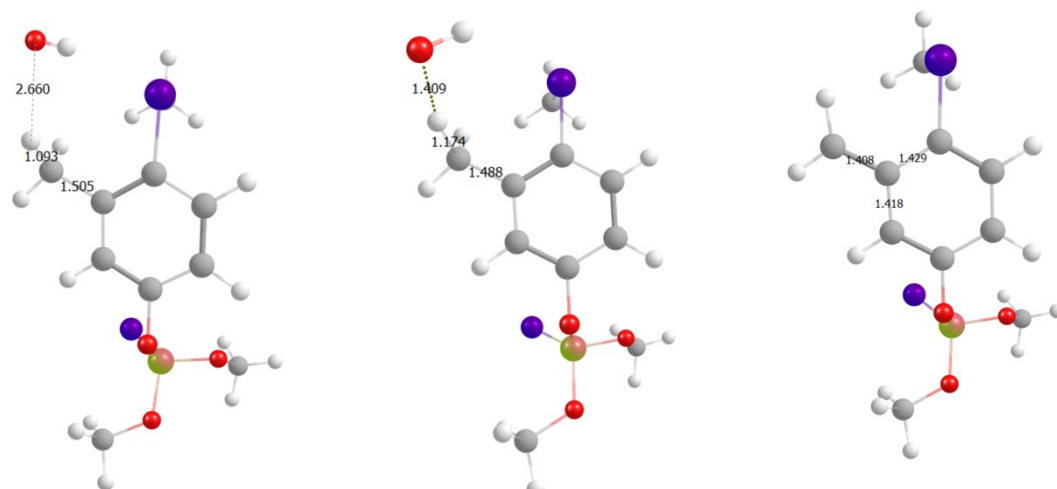

R6

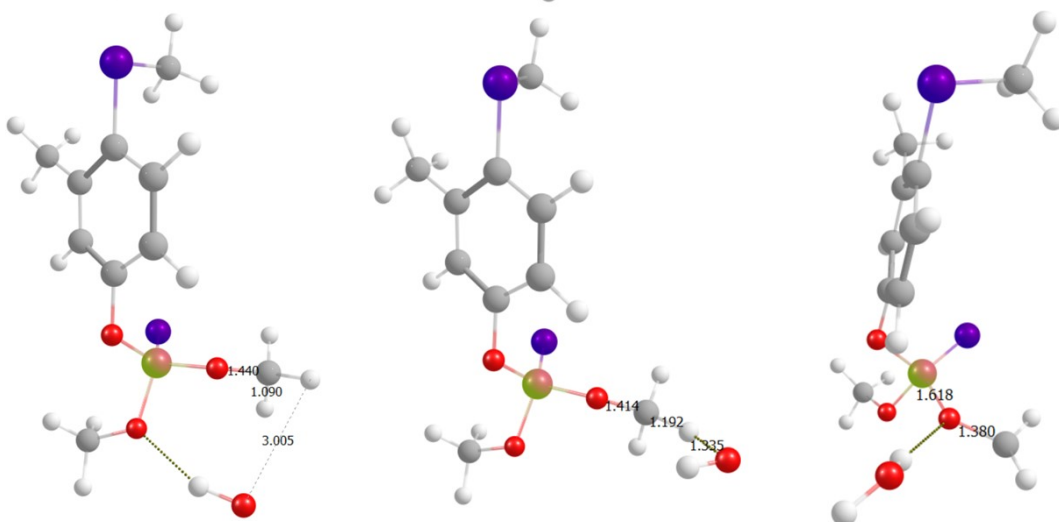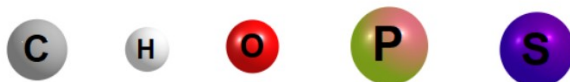

**Figure S2.** The geometry of reactive species involved in the H abstraction reaction of fenthion initiated by  $\bullet\text{OH}$  optimized at M06-2X/6-311++G(d,p) level of theory.

**REACTANT COMPLEX  
(RC)**

**TRANSITION STATE  
(TS)**

**PRODUCT  
(P)**

**R7**

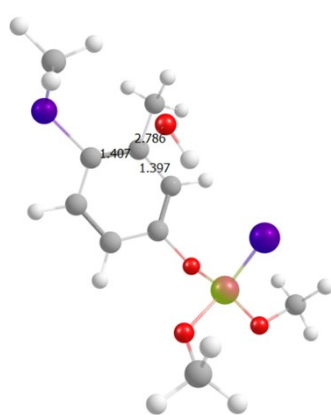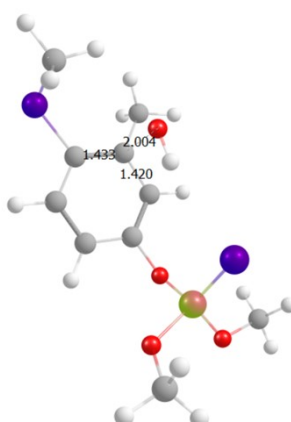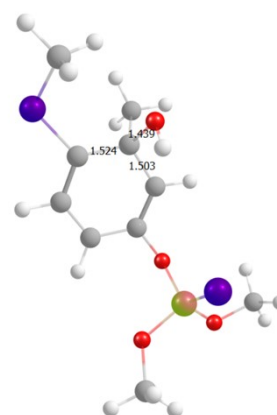

**R8**

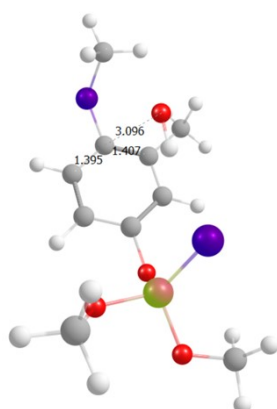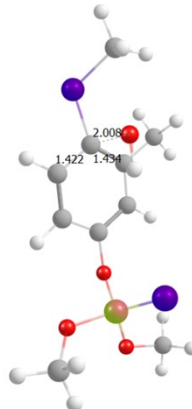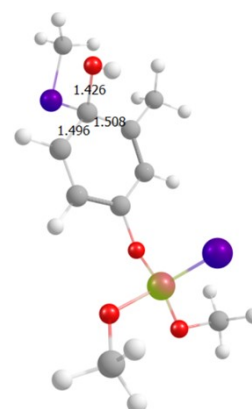

**R9**

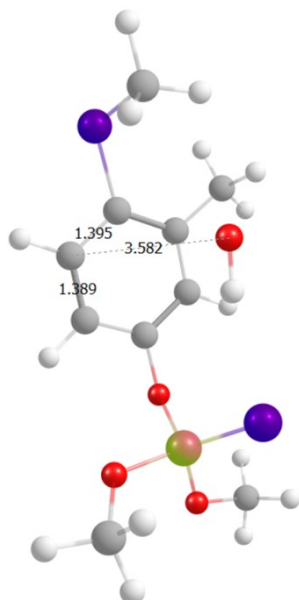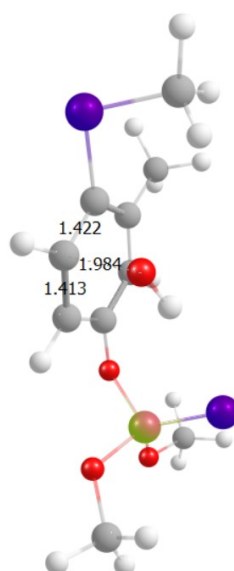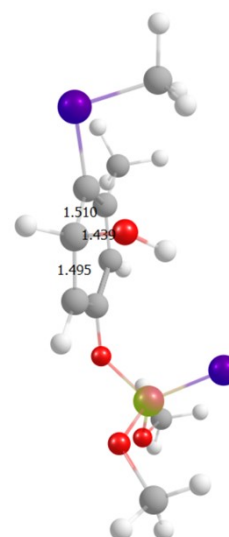

R10

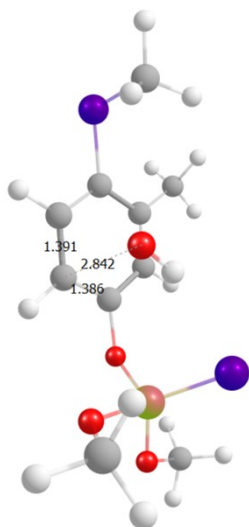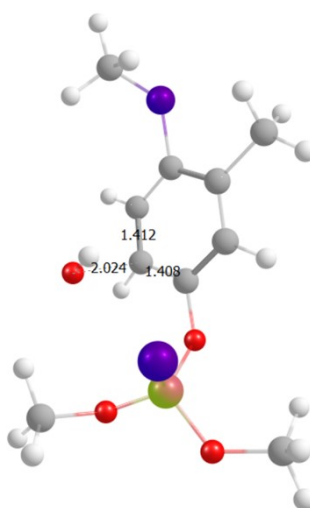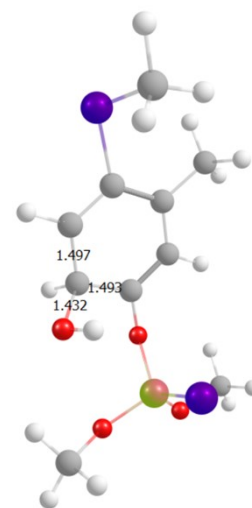

R11

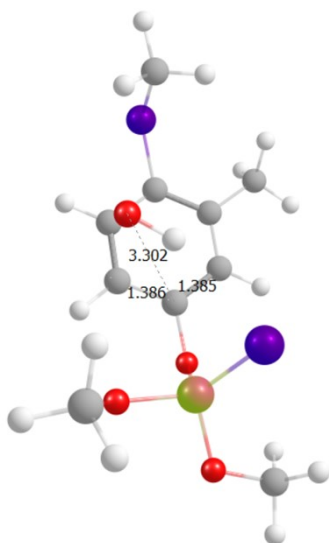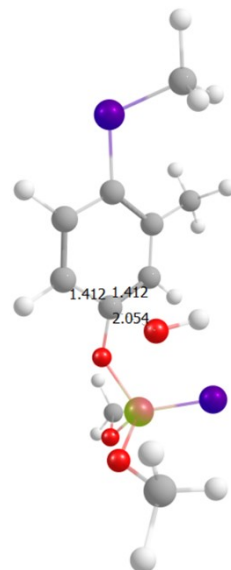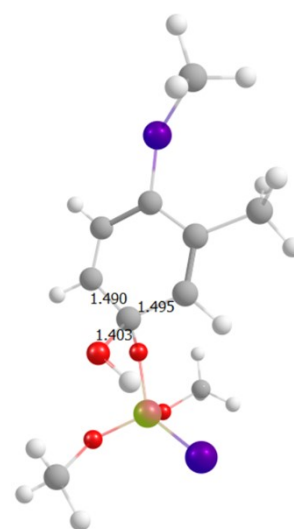

R12

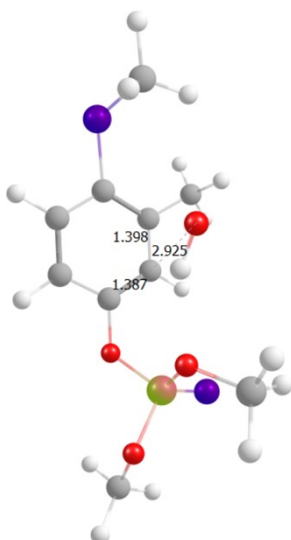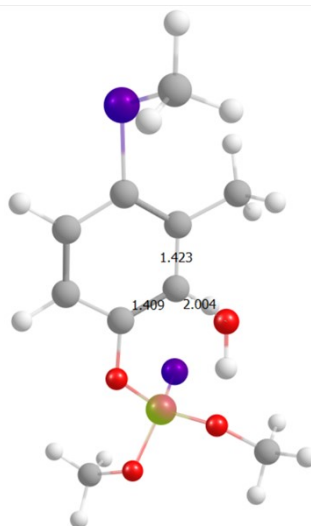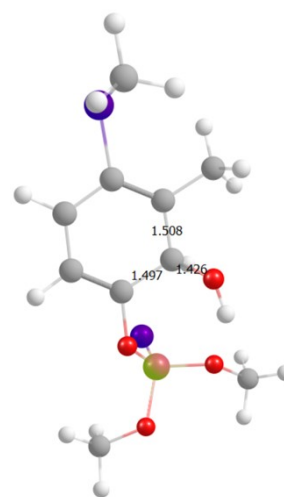

R13

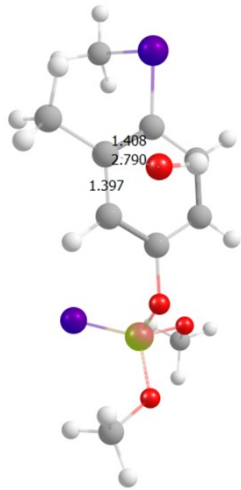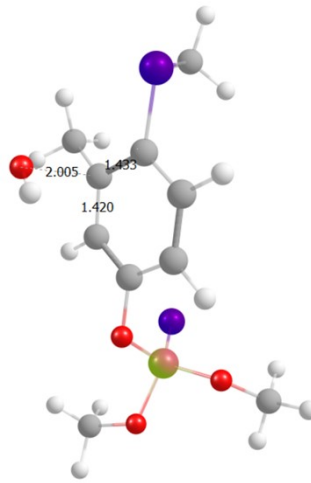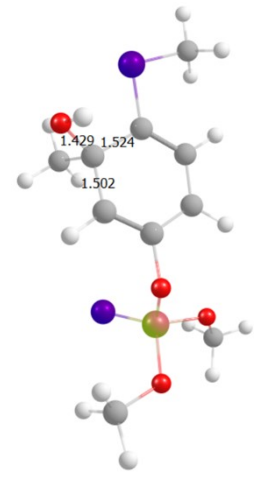

R14

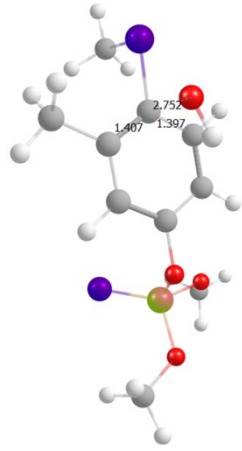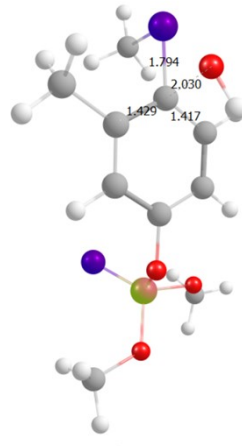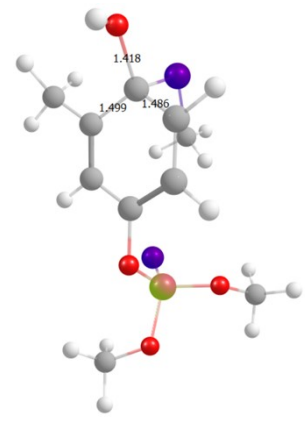

R15

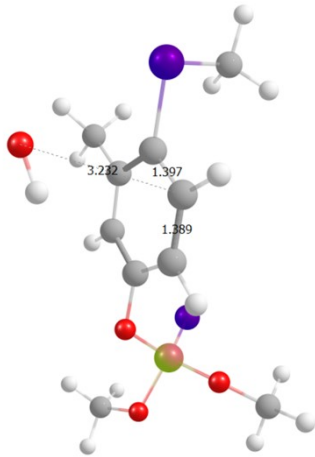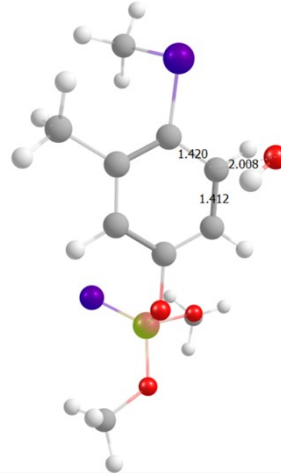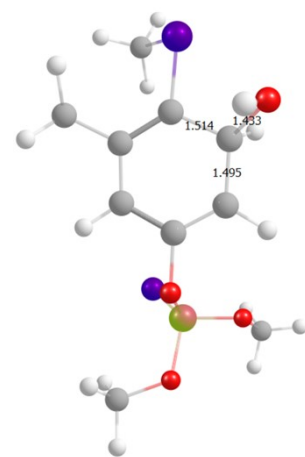

R16

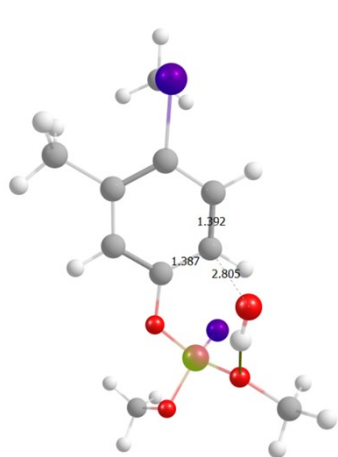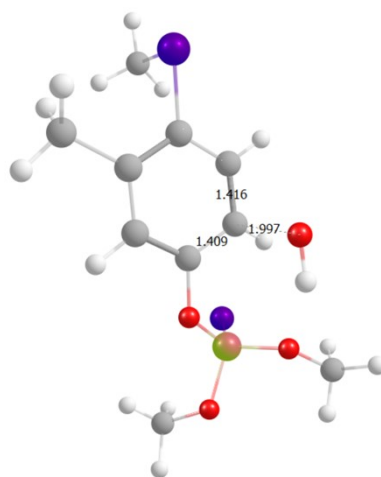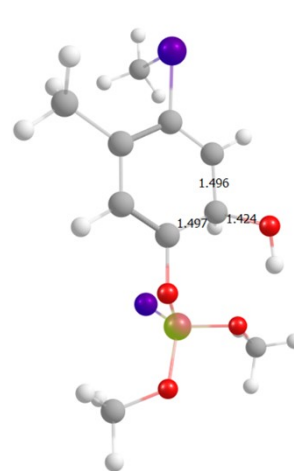

R17

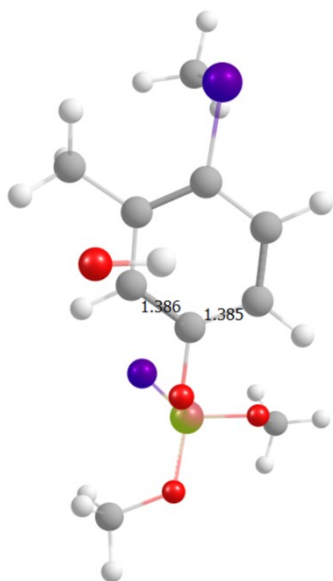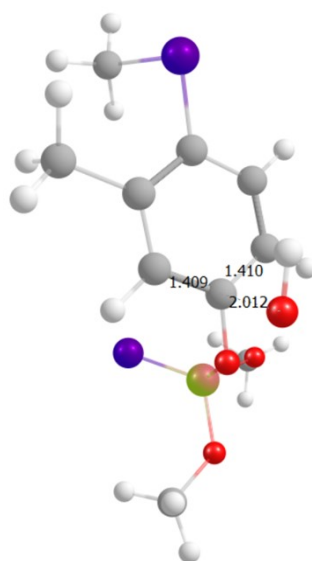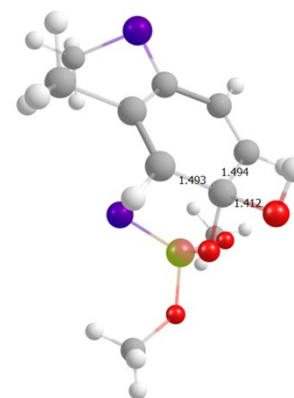

R18

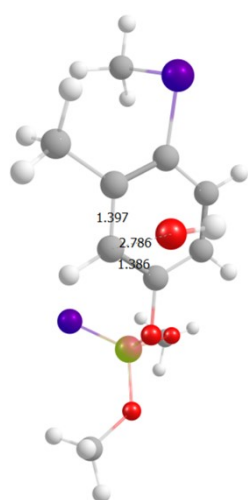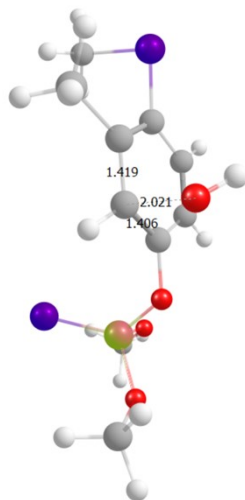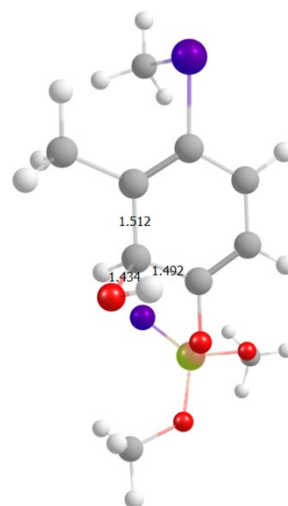

R19

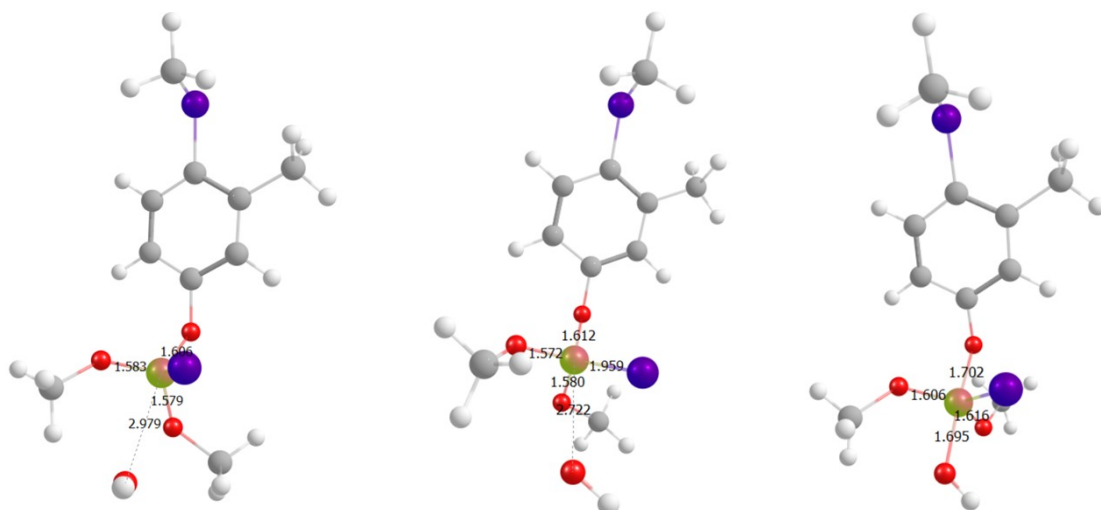

R20

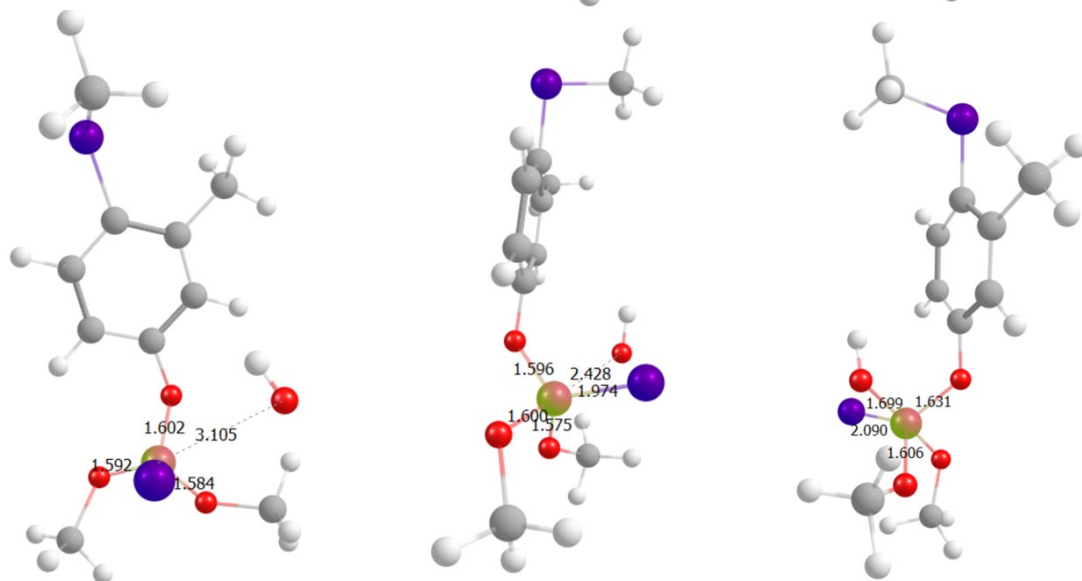

**Figure S3.** The geometry of reactive species involved in the  $\bullet\text{OH}$ -addition reactions of fenthion optimized at M06-2X/6-311++G(d,p) level of theory.

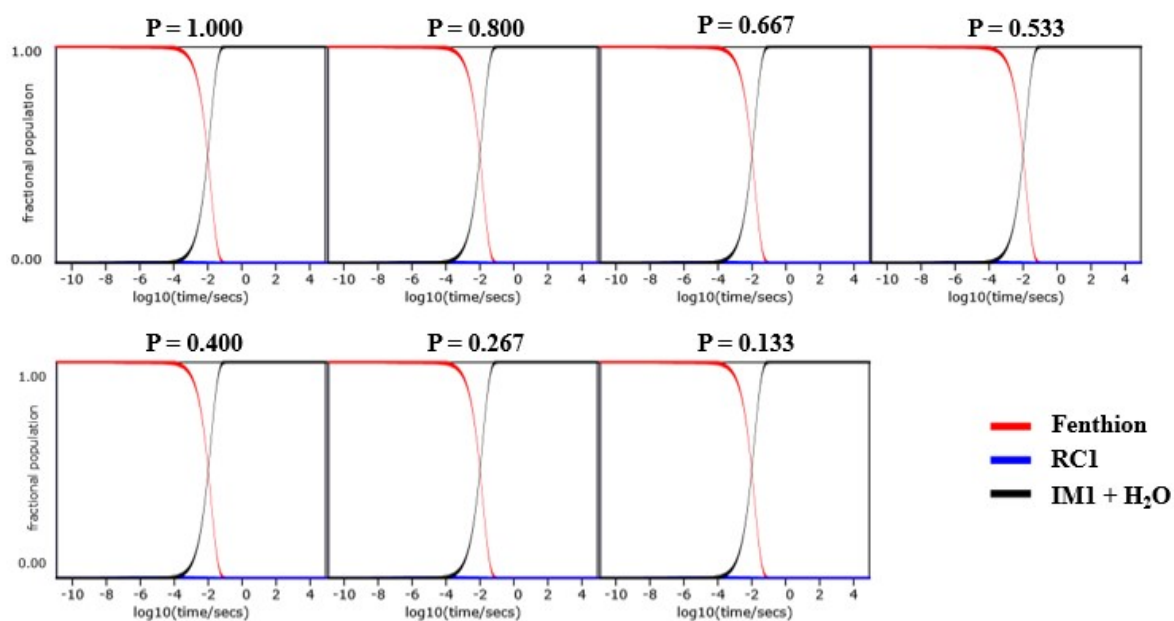

**Figure S4.** Time-dependent species population profiles for the reaction pathway R1 at 298 K, calculated at different pressures (P) using MESMER software employing RRKM theory. The pressure values are given in bar.

REACTANT COMPLEX  
(RC)

TRANSITION STATE  
(TS)

PRODUCT  
(P)

S1FE

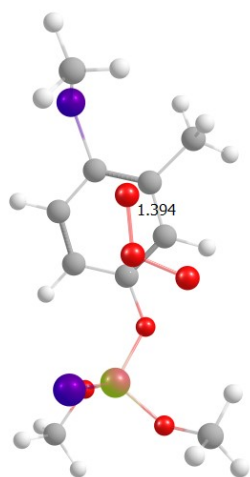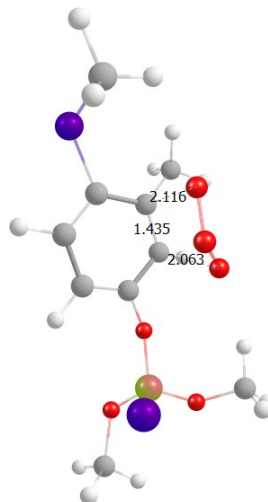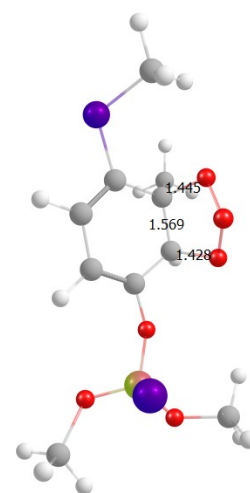

S1FX

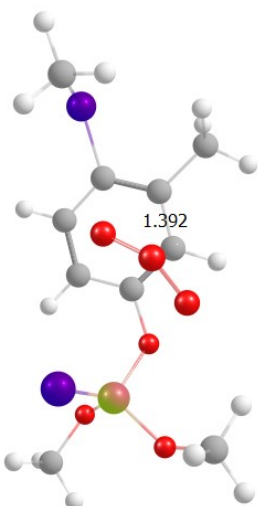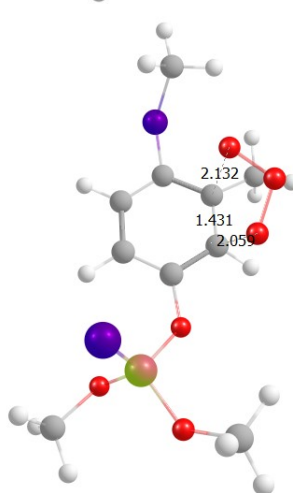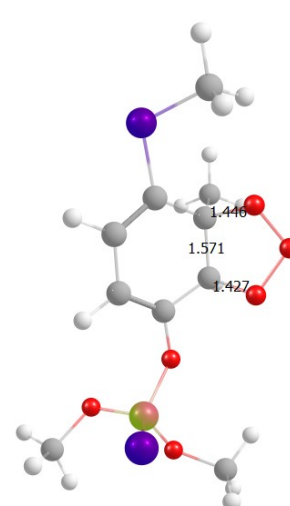

S1BE

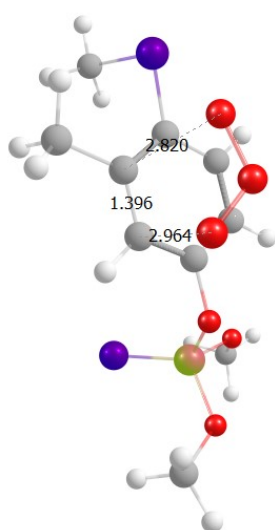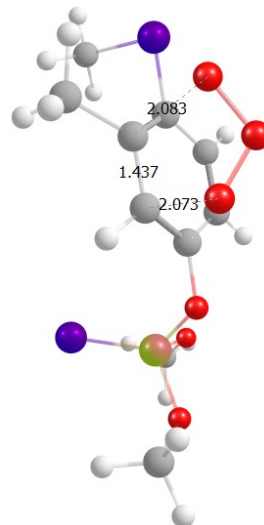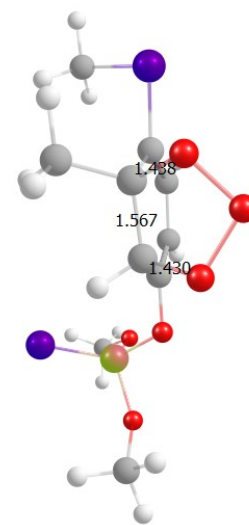

**S1BX**

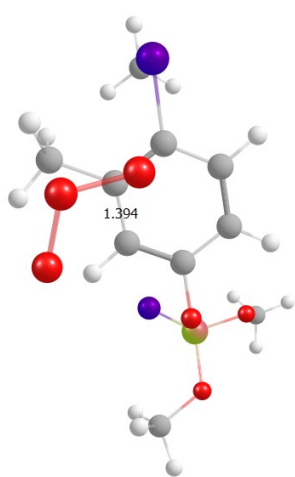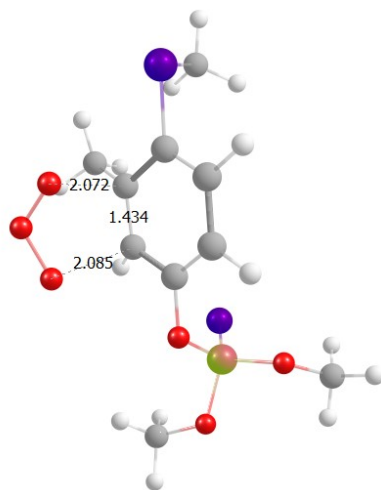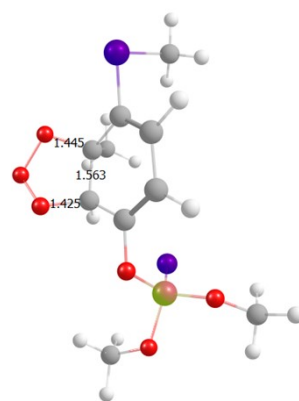

**S2FE**

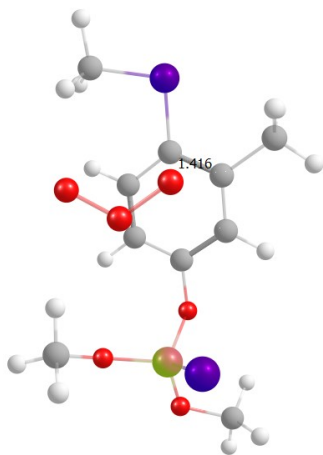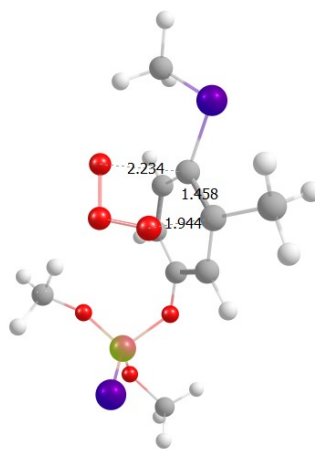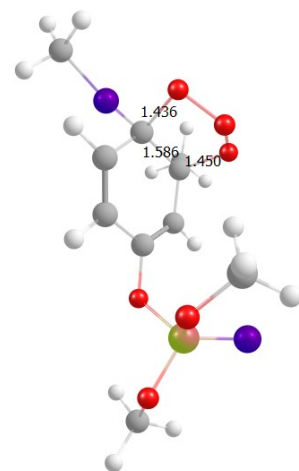

**S2FX**

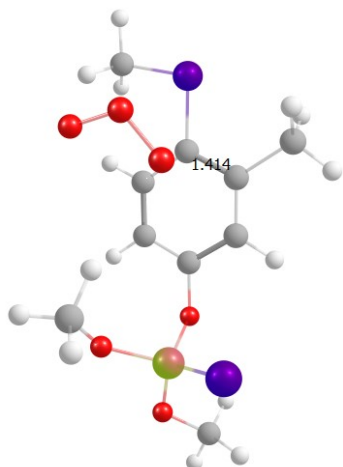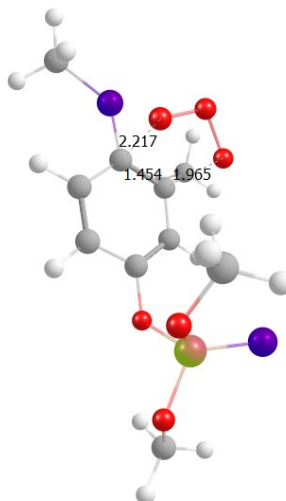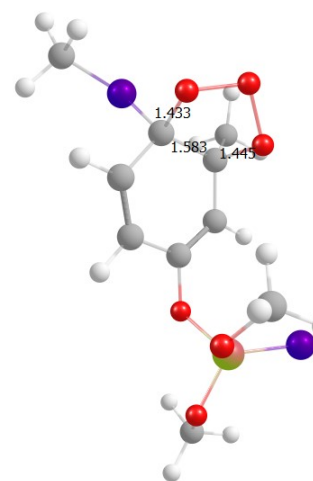

S2BE

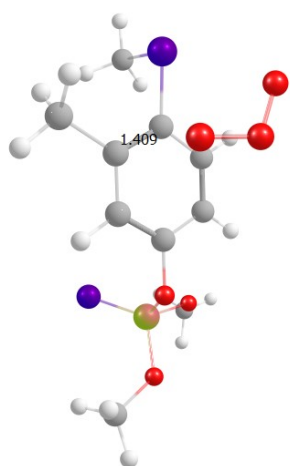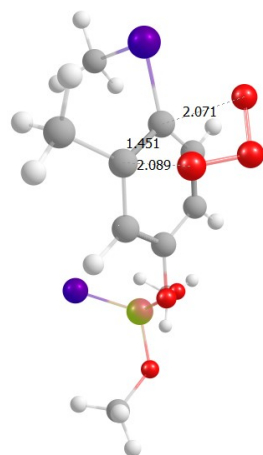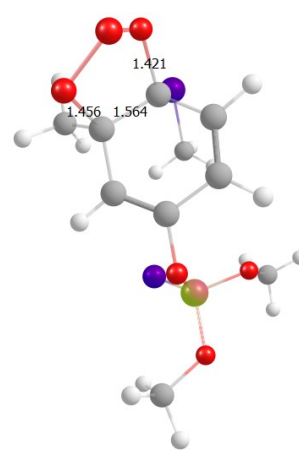

S2BX

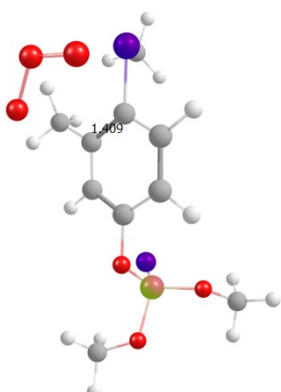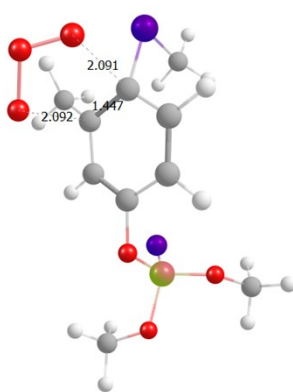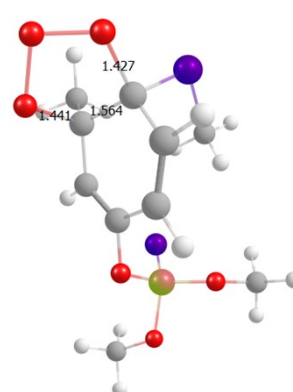

S3FE

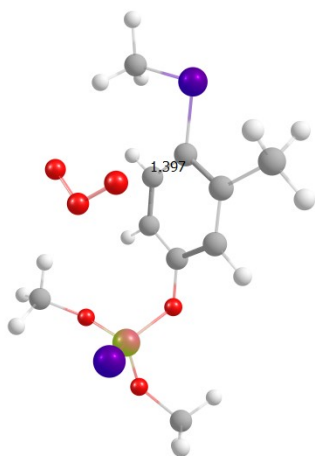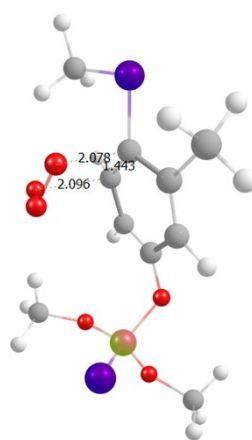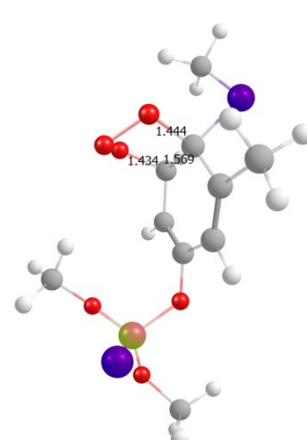

S3FX

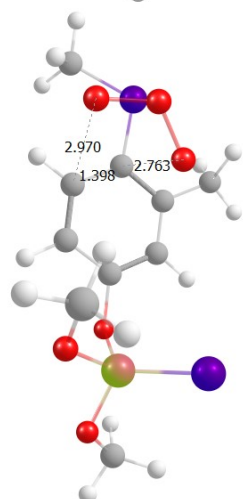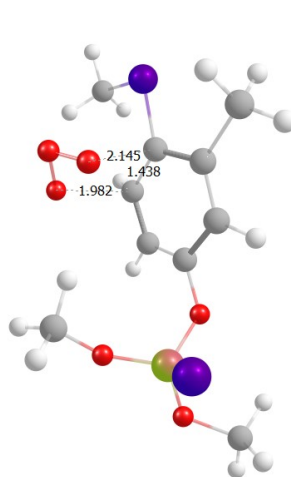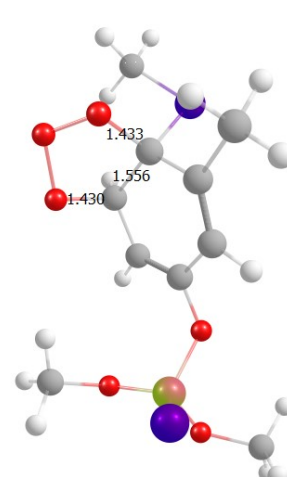

**S3BE**

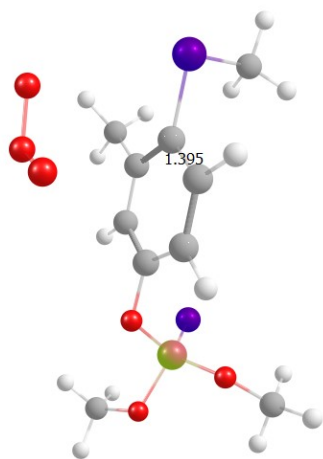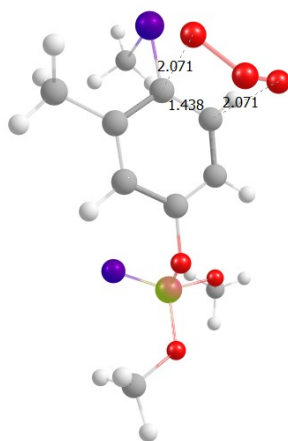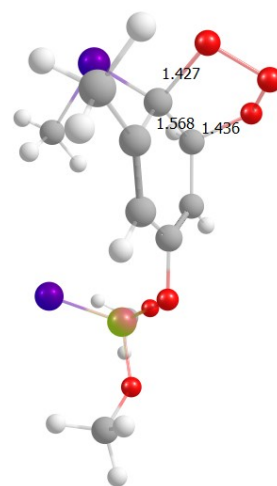

**S3BX**

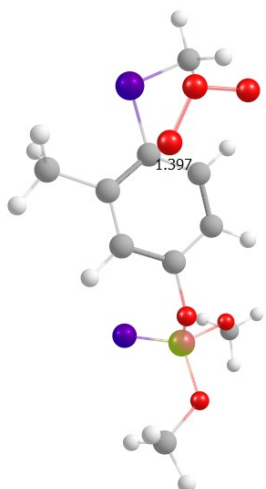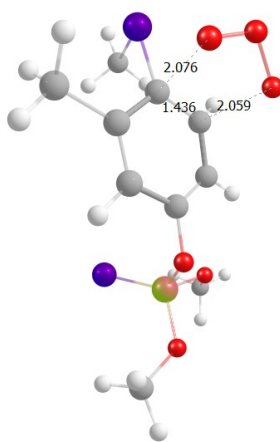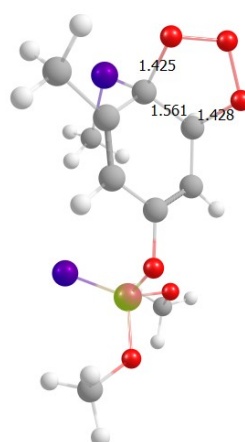

**S4FE**

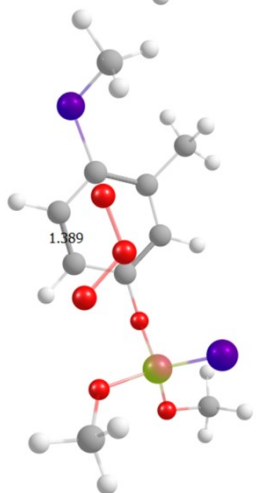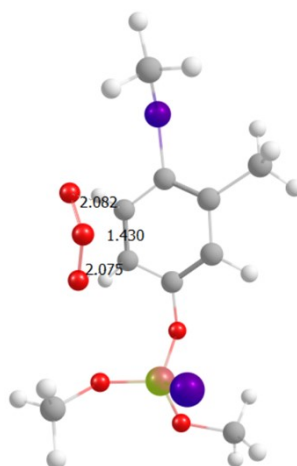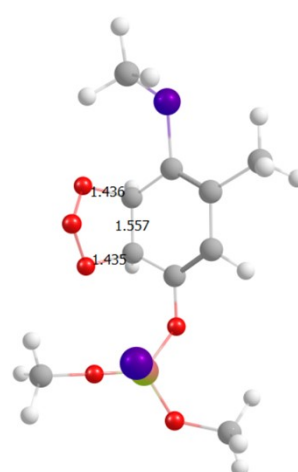

S4FX

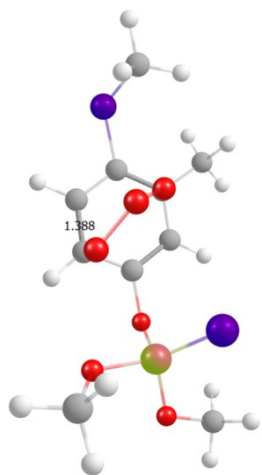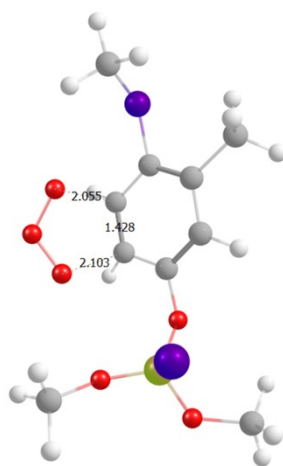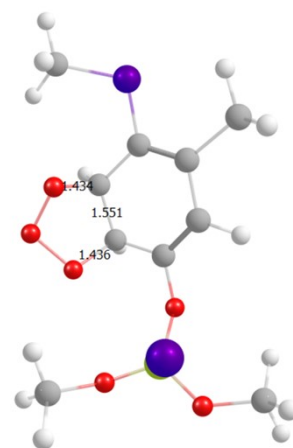

S4BE

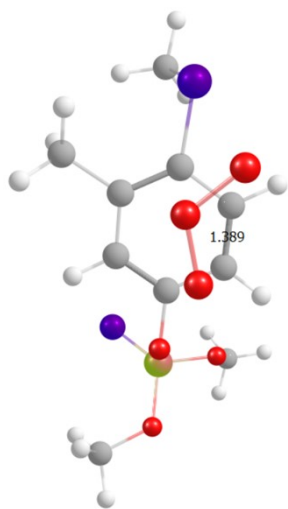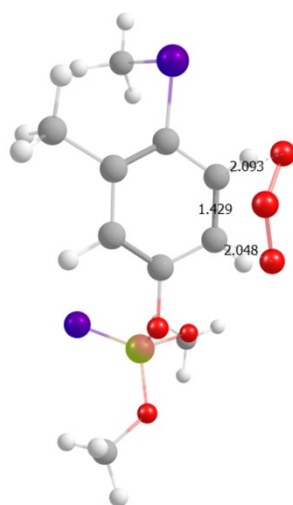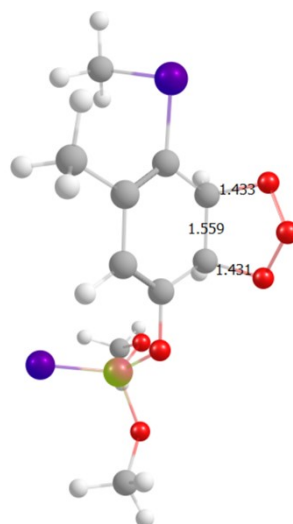

S4BX

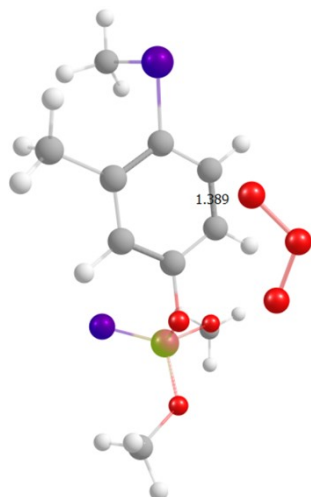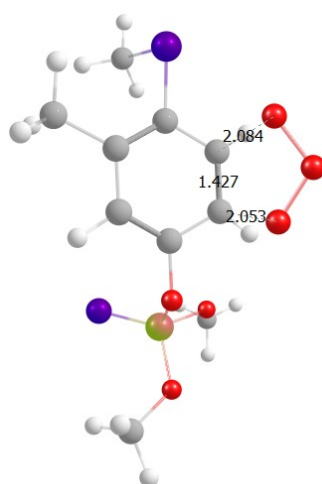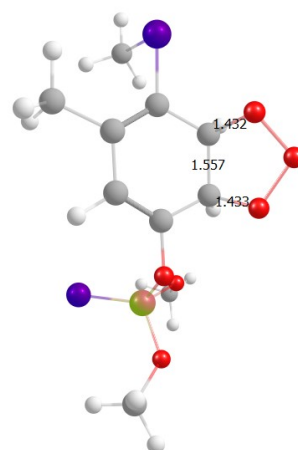

**S5FE**

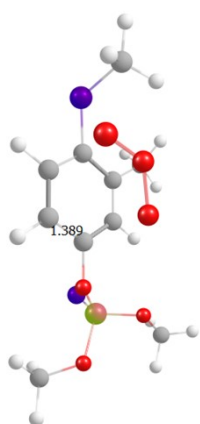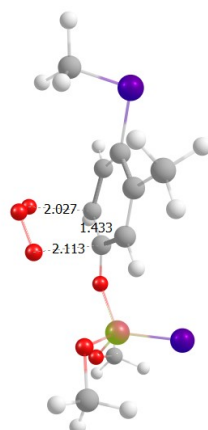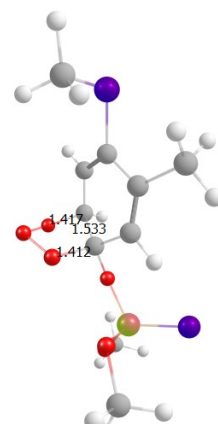

**S5FX**

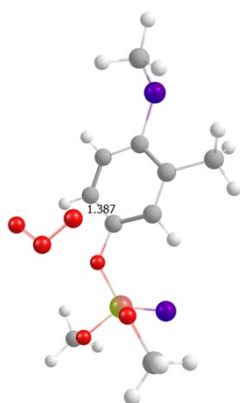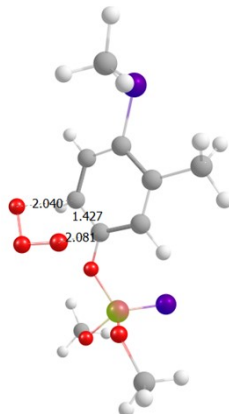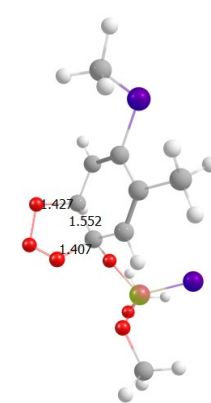

**S5BE**

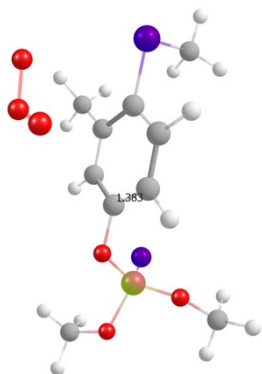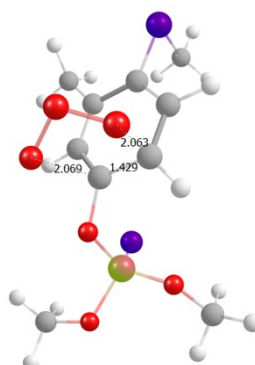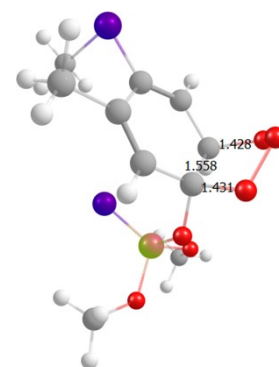

**S5BX**

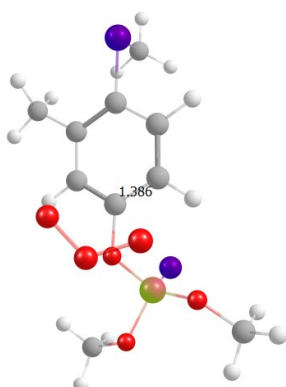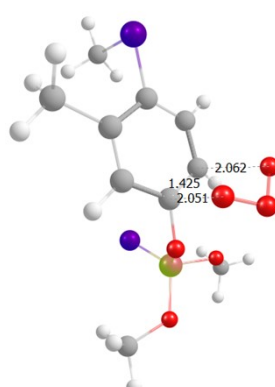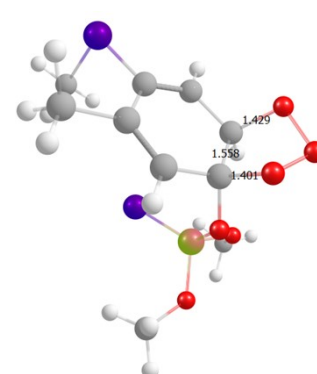

**S6FE**

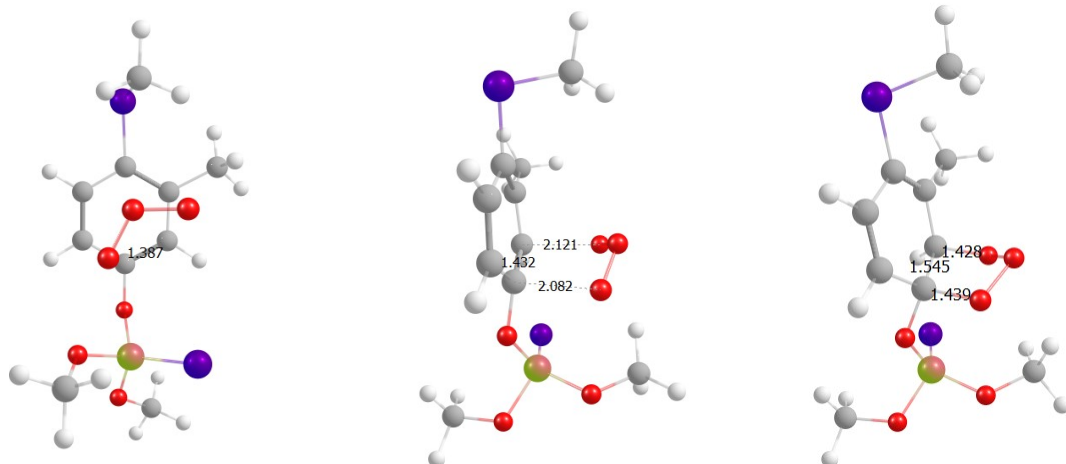

**S6FX**

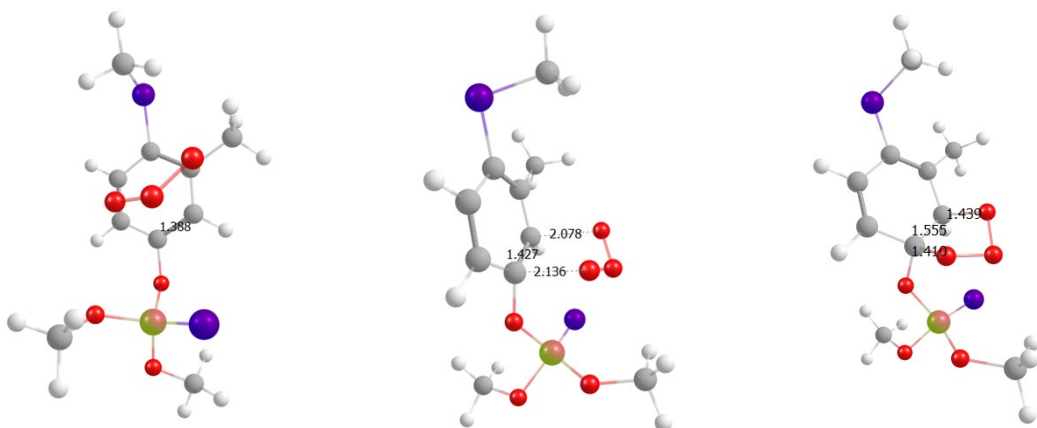

**S6BE**

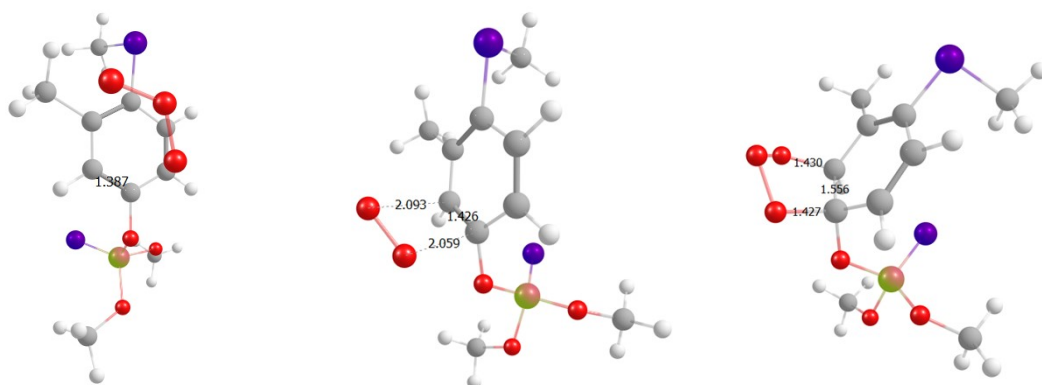

**S6BX**

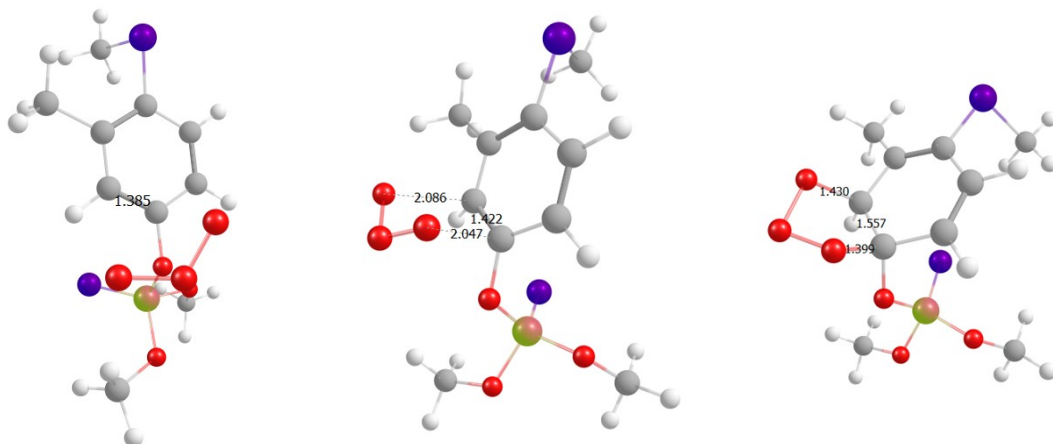

S7

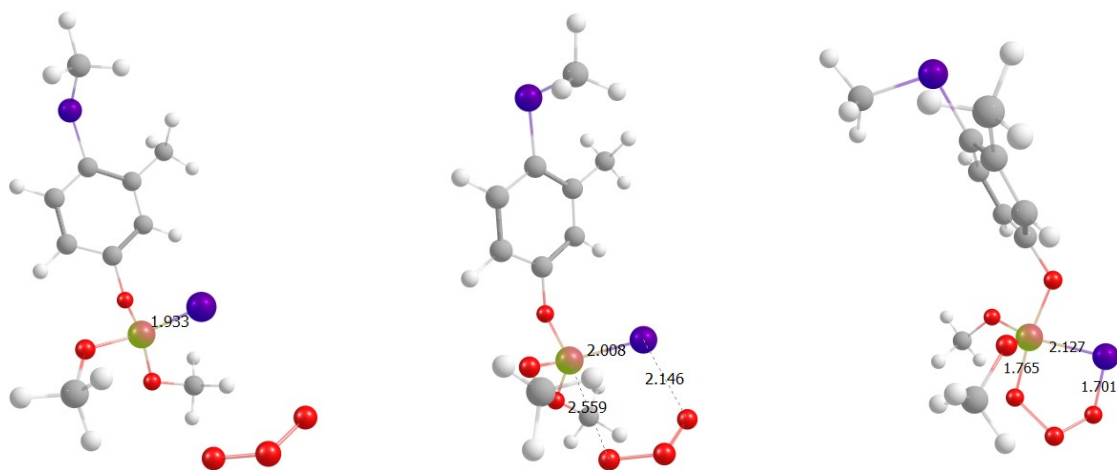

**Figure S5.** The geometry of reactive species involved in the O<sub>3</sub>-initiated reactions of fenthion optimized at M06-2X/6-311++G(d,p) level of theory.
